# Supplementary material for: Cancer care coordinators in stage III colon cancer: a cost-utility analysis
Source: Springer Nature journal article supplement (doi:10.1186/s12913-015-0970-5), 2015-08-04
Supplement: MOESM2 [file 9757516]

# Additional File 2:

## Economic decision model

### For ‘Cancer care coordinators in Stage III colon cancer: a cost-utility analysis’

Tony Blakely<sup>1†</sup>, Lucie Collinson<sup>1</sup>, Giorgi Kvizhinadze<sup>1</sup>, Nisha Nair<sup>1</sup>, Rachel Foster<sup>1</sup>, Elizabeth Dennett<sup>2</sup>, Diana Sarfati<sup>1</sup>

<sup>1</sup>Burden of Disease Epidemiology, Equity, and Cost-Effectiveness (BODE<sup>3</sup>) Programme, Department of Public Health, University of Otago Wellington, PO Box 7343, Wellington, New Zealand

<sup>2</sup>Department of Surgery, University of Otago Wellington, PO Box 7343, Wellington, New Zealand

†corresponding author

#### Contents

|                                                                                                                                     |    |
|-------------------------------------------------------------------------------------------------------------------------------------|----|
| ADDITIONAL FILE 2: ECONOMIC DECISION MODEL.....                                                                                     | 3  |
| Overview of model.....                                                                                                              | 3  |
| Table of all input parameters used in model.....                                                                                    | 7  |
| Heterogeneity in the baseline model .....                                                                                           | 18 |
| Stage III colon cancer rates by demographic strata.....                                                                             | 18 |
| Stage III colon cancer rates and counts by socio-demographic and baseline clinical strata .....                                     | 21 |
| Clinical transition time: diagnosis to surgery; surgery to chemotherapy.....                                                        | 23 |
| Excess mortality rates by socio-demographic (i) and clinical (j) strata.....                                                        | 27 |
| Morbidity .....                                                                                                                     | 31 |
| Intervention parameters.....                                                                                                        | 32 |
| The proportion of people receiving surgery only in the comparator who additionally receive chemotherapy with the intervention ..... | 32 |
| Excess mortality rates under intervention: increasing coverage of chemotherapy.....                                                 | 36 |

|                                                                                                                       |    |
|-----------------------------------------------------------------------------------------------------------------------|----|
| Proportionate reduction in average days to surgery; $\Delta[Dx \rightarrow Surg_i]$ .....                             | 37 |
| Proportionate reduction in average days to chemotherapy; $\Delta[Surg \rightarrow Chemo_i]$ .....                     | 39 |
| Reduction in cancer excess mortality per day decrease in time to surgery; EMRR<br>[Dx $\rightarrow$ Surgery/day]..... | 40 |
| Reduction in cancer excess mortality per day decrease in time to chemo; EMRR [Dx $\rightarrow$<br>Chemo/day] .....    | 43 |
| Proportionate reduction in disability weight.....                                                                     | 44 |
| REFERENCES .....                                                                                                      | 47 |

## 1 **Additional File 2: Economic decision model**

2 This additional file describes in detail the simulation model used in analyses. The description is in  
3 four parts:

- 4 1. Overview of model
- 5 2. Table of all input parameters used in the model (detailed description of complex input  
6 parameters covered in parts 3, 4, and 5)
- 7 3. Heterogeneity in the baseline model:
  - 8 a. generation of colon cancer incidence in 2011 by demographic strata
  - 9 b. further stratification of incidence by baseline clinical strata treatment
  - 10 c. clinical transition times (e.g. provisional diagnosis to surgery) by socio-demographic  
11 and clinical strata.
  - 12 d. cancer (excess) mortality rates by socio-demographic and clinical strata
- 13 4. Morbidity
- 14 5. Intervention parameters

15 Regarding the input parameters, they come from BODE<sup>3</sup> data (e.g. projected population mortality  
16 rates), external data and estimates. All are summarised below (the input parameter tables in the  
17 main paper are abbreviated versions of Table 1 in this file). All sources and assumptions are detailed  
18 in this file, although the more detailed literature reviews and methods (e.g. costing and input  
19 parameter estimation) are in Additional Files 3-5.

## 20 **Overview of model**

21 Much of the morbidity and mortality impact of the CCC intervention will be through increased  
22 timeliness of care – that is shortening transitions through the event pathway. Thus, time to event  
23 modelling is preferable. We also place emphasis on modelling population heterogeneity. Thus, we  
24 elected to use discrete event simulation (DES) modelling.

25 Regarding baseline population heterogeneity, we generated estimates from New Zealand data of the  
26 following by strata of sex, age, ethnicity and deprivation:

- 27 • incidence rates and counts of stage III colon cancer in 2011, which become probability  
28 distributions for sampling 'types of people' to model.
- 29 • cancer excess mortality rates (EMRs; i.e. death rates among cancer patients beyond that  
30 expected given sub-population life tables [1]) for cases diagnosed in 2011, and by time from  
31 diagnosis, for the above socio-demographic and baseline clinical strata (i.e. surgery only or  
32 surgery and chemotherapy,  $j=1$  and  $j=2$ ). These rates (and those derived from them based on  
33 intervention parameters below) are then converted to cumulative distribution functions  
34 (CDF) for later DES modelling.
- 35 • population mortality rates from life tables that are also then converted to CDFs.
- 36 • several clinical transition times: days from provisional diagnosis to surgery; days from  
37 surgery to commencement of chemotherapy. These were again specified as CDFs, given the  
38 cumulative proportion of people (of a certain socio-demographic group) that will have  
39 transitioned to the next phase by any number of days.

40 The sources and parameterisation of this baseline heterogeneity is described in more detail in the  
41 remainder of this file.

42 Regarding parameterisation of the intervention effect itself, there are both epidemiological and  
43 intervention (incremental) cost parameters. The intervention parameters (all assumed constant  
44 across population heterogeneity) are of four types:

- 45 • Proportionate reductions in transition times through the treatment pathway. For example, if  
46 CCC reduces time to surgery by 20%, then this intervention parameter is applied to all the  
47 individual sampled transit times in the DES microsimulation.

- 48       • Proportionate reductions in cancer excess mortality rates (EMR), usually due to hastening of  
49       transit. For example, there may be 0.5% reduction in the EMR for each day earlier that  
50       chemotherapy is commenced. Thus, the actual change in the EMR in a given simulation is a  
51       function of both the parameter introduced in this bullet point, and that in the previous  
52       bullet point.
- 53       • Increased coverage of chemotherapy. For example, the proportion of people receiving  
54       surgery only in the baseline who then move to receiving surgery and chemotherapy with the  
55       CCC programme.
- 56       • And a percentage reduction in the diagnosis and treatment morbidity weight or DW due to  
57       improved quality of life with CCC.

58       Note that whilst all these epidemiological intervention parameters are assumed constant across  
59       population heterogeneity, the *absolute* impact (e.g. number of days gained) will vary by socio-  
60       demographics given differing baseline parameters. For example, Māori have higher EMR meaning  
61       that a constant proportionate reduction in the EMR will incur a greater absolute benefit to Māori.  
62       The sources and derivation of these epidemiological parameters is described in greater detail below.

63       Regarding the economic decision model itself, this involved the following general schema. First,  
64       comparator and intervention arms were modelled in parallel. Second, the population heterogeneity,  
65       parameter uncertainty and stochastic variability were incorporate [2]. Accordingly, we followed a  
66       general schema of selecting the broad population groups to model, randomly sampling from these  
67       types of people (i.e. socio-demographic strata i) and from the probability distributions of the  
68       intervention parameters as the outer loop in the Monte Carlo simulations. In the next loop, the inner  
69       loop, we sampled individuals per clinical strata (surgery vs. surgery and chemotherapy) and their  
70       random walks (stochastic variation) were simulated accordingly.

71 **Figure 1: Discrete event simulation (DES) model structure reflecting heterogeneity, parameter uncertainty and stochastic variation of**  
 72 **individual level parameters**

73

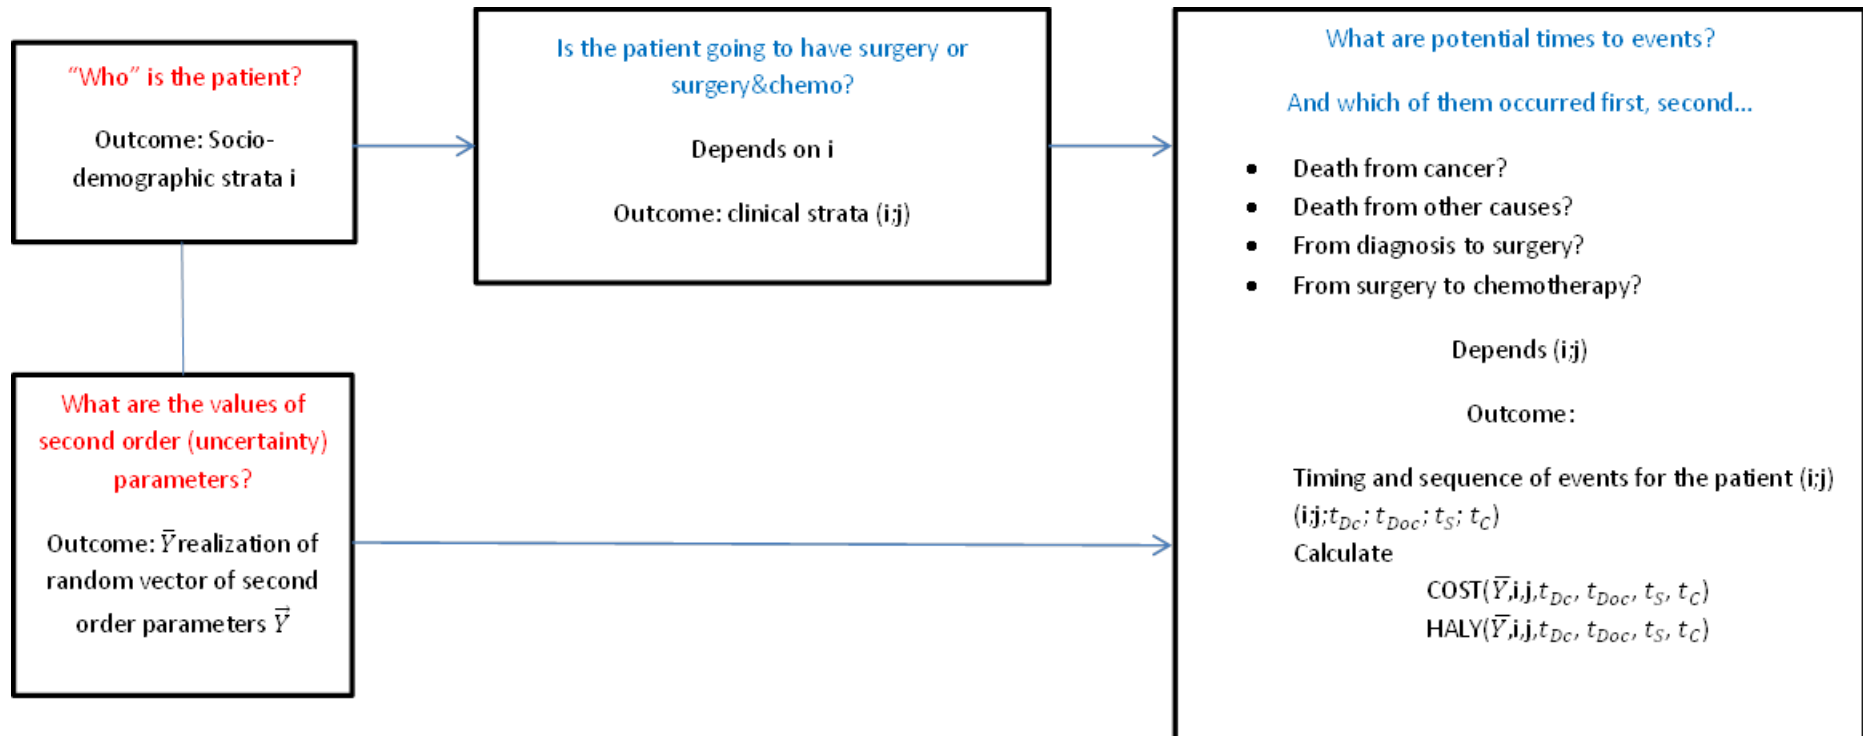

74

75 **Table of all input parameters used in model**

76 The full list of input parameters used in the model is presented here at tabular form. The text that follows explains in greater detail how complex input  
 77 parameters were derived and applied to the model.

78 **Table 1: Full Input Parameter Table**

| VARIABLE NAME                             | VARIABLE DEFINITION                                                                                                                                                       | SOURCE                                              | DERIVATION FROM SOURCE & APPLICATION TO MODEL | HETEROGENEITY BY AGE/SEX/ETHNICITY/DEPRIVATION                                                                             | EXPECTED VALUE                  | UNCERTAINTY INTERVAL (95% UI) | DISTRIBUTION | SENSITIVITY of ICER to this variable <sup>1</sup> |
|-------------------------------------------|---------------------------------------------------------------------------------------------------------------------------------------------------------------------------|-----------------------------------------------------|-----------------------------------------------|----------------------------------------------------------------------------------------------------------------------------|---------------------------------|-------------------------------|--------------|---------------------------------------------------|
| <b><i>Time to 'Event'</i></b>             |                                                                                                                                                                           |                                                     |                                               |                                                                                                                            |                                 |                               |              |                                                   |
| A. <i>Time to death from colon cancer</i> | Time from provisional diagnosis of colon cancer to death from colon cancer (using colon cancer excess mortality rates for stage III colon cancer by time since diagnosis) | NZ Cancer Registry data linked to mortality data[3] | See text below                                | Yes (by age, sex, ethnicity, deprivation). Further disaggregated by receipt of surgery alone or surgery plus chemotherapy. | See Figure 5 and Figure 6 below | Nil                           | Nil          | n/a                                               |

<sup>1</sup> The extent that uncertainty in an intervention input parameter contributes to overall uncertainty in the ICER (i.e. variation in ICER for the 2.5<sup>th</sup> to 97.5<sup>th</sup> percentile values of this input parameter, as a percentage of the 95% UI from the full Monte Carlo analysis). For low percentage values, further improvement in estimation is not warranted. For high percentage values, the input parameter must be examined closely, e.g. in future research, by decision-makers in weighing the assumptions of the model, etc. This column is also presented visually as the tornado plot analysis in the main article.

| VARIABLE NAME                                    | VARIABLE DEFINITION                                                                                                       | SOURCE                                                          | DERIVATION FROM SOURCE & APPLICATION TO MODEL | HETEROGENEITY BY AGE/SEX/ETHNICITY/DEPRIVATION | EXPECTED VALUE                                                                                                                                                                                                                       | UNCERTAINTY INTERVAL (95% UI)  | DISTRIBUTION     | SENSITIVITY of ICER to this variable <sup>1</sup> |
|--------------------------------------------------|---------------------------------------------------------------------------------------------------------------------------|-----------------------------------------------------------------|-----------------------------------------------|------------------------------------------------|--------------------------------------------------------------------------------------------------------------------------------------------------------------------------------------------------------------------------------------|--------------------------------|------------------|---------------------------------------------------|
| <i>B. Time to death from other causes</i>        | Time from diagnosis of colon cancer to death from other causes (using background or expected population mortality rates). | Projected NZ Life Tables Report[4]                              | See text below                                | Yes (by age, sex, ethnicity, deprivation).     | Projected NZ Life Tables Report[4]                                                                                                                                                                                                   | Nil                            | Nil              | n/a                                               |
| <i>C. Time from diagnosis to surgery in days</i> | Usual time from provisional diagnosis of colon cancer to surgery without a CCC                                            | Hospital notes review of 600 colon cancer patients 1996-2003[5] | See text below                                | Yes (by age, sex, ethnicity, deprivation).     | 22.6% of patients assumed to have zero time to surgery (diagnosed at surgery or emergency presentation).<br><br>For rest: mean time ranged from 13 days for young non-Māori female to 40 days for old Māori male. See Table 6 below. | Nil<br><br>See Figure 4 below. | Nil<br><br>Gamma | n/a<br><br>n/a                                    |



| VARIABLE NAME                                        | VARIABLE DEFINITION                                            | SOURCE                                                          | DERIVATION FROM SOURCE & APPLICATION TO MODEL                                                              | HETEROGENEITY BY AGE/SEX/ETHNICITY/DEPRIVATION | EXPECTED VALUE                                                                                             | UNCERTAINTY INTERVAL (95% UI) | DISTRIBUTION | SENSITIVITY of ICER to this variable <sup>1</sup> |
|------------------------------------------------------|----------------------------------------------------------------|-----------------------------------------------------------------|------------------------------------------------------------------------------------------------------------|------------------------------------------------|------------------------------------------------------------------------------------------------------------|-------------------------------|--------------|---------------------------------------------------|
| <i>D. Time from surgery to start of chemotherapy</i> | Usual time from surgery to start of chemotherapy without a CCC | Hospital notes review of 600 colon cancer patients 1996-2003[5] | See text below                                                                                             | Yes (by age, sex, ethnicity, deprivation).     | Mean time ranged from 51 days for young non-Māori female to 97 days for old Māori male. See Table 6 below. | See Figure 4 below.           | Gamma        | n/a                                               |
| <i>E. Time from beginning to end of chemotherapy</i> | Usual duration of chemotherapy in stage III colon cancer       | Best practice guidance (Des Guetz meta-analysis[6] and Medsafe) | Nil                                                                                                        | No                                             | 6 months                                                                                                   | Nil                           | Nil          | n/a                                               |
| <b>Durations of Cancer Phases</b>                    |                                                                |                                                                 |                                                                                                            |                                                |                                                                                                            |                               |              |                                                   |
| <i>Duration of PT phase</i>                          | Duration of pre-terminal (PT) phase                            | Relies on variable A defined above.                             | If dying from colon cancer, assumed one month in terminal state and 3 months before in pre-terminal state. | No                                             | 4 to 1 months prior to event A (death from colon cancer)                                                   | Nil                           | n/a          | n/a                                               |

| <b>VARIABLE NAME</b>                  | <b>VARIABLE DEFINITION</b>                     | <b>SOURCE</b>                            | <b>DERIVATION FROM SOURCE &amp; APPLICATION TO MODEL</b>                                                  | <b>HETEROGENEITY BY AGE/SEX/ETHNICITY/DEPRIVATION</b>                               | <b>EXPECTED VALUE</b>                                                                                      | <b>UNCERTAINTY INTERVAL (95% UI)</b> | <b>DISTRIBUTION</b> | <b>SENSITIVITY of ICER to this variable<sup>1</sup></b> |
|---------------------------------------|------------------------------------------------|------------------------------------------|-----------------------------------------------------------------------------------------------------------|-------------------------------------------------------------------------------------|------------------------------------------------------------------------------------------------------------|--------------------------------------|---------------------|---------------------------------------------------------|
| <i>Duration of T phase</i>            | Duration of terminal (T) phase                 | Relies on variable A defined above.      | If dying from colon cancer, assumed one month in terminal state and 3 months before in pre-terminal state | No                                                                                  | 1 month prior to event A (death from colon cancer)                                                         | Nil                                  | n/a                 | n/a                                                     |
| <i>Duration of DT phase</i>           | Duration of diagnosis and treatment (DT) phase | Relies on variables A-D defined above.   | Assumed 2 months to recover from surgery, and 6 months' duration of chemotherapy.                         | Disaggregated by receipt of surgery alone (k=1) or surgery plus chemotherapy (k=2). | For k=1: minimum of [C + 2 months, A-4 months, B]<br><br>For k=2, minimum of [C+D+6 months, A-4 months, B] | Nil                                  | n/a                 | n/a                                                     |
| <i>Duration of R phase</i>            | Duration of remission (R) phase                | Relies on three durations defined above. | Assumed cured if 8 years post-diagnosis of colon cancer.                                                  | No                                                                                  | Residual time from 8 years post-diagnosis, minus time in DT phase and any time in PT or T phases.          | Nil                                  | n/a                 | n/a                                                     |
| <b>Cancer Disability Weights (DW)</b> |                                                |                                          |                                                                                                           |                                                                                     |                                                                                                            |                                      |                     |                                                         |

| VARIABLE NAME | VARIABLE DEFINITION                                     | SOURCE                                                     | DERIVATION FROM SOURCE & APPLICATION TO MODEL                                                                                                  | HETEROGENEITY BY AGE/SEX/ETHNICITY/DEPRIVATION | EXPECTED VALUE                                                                       | UNCERTAINTY INTERVAL (95% UI) | DISTRIBUTION | SENSITIVITY of ICER to this variable <sup>1</sup> |
|---------------|---------------------------------------------------------|------------------------------------------------------------|------------------------------------------------------------------------------------------------------------------------------------------------|------------------------------------------------|--------------------------------------------------------------------------------------|-------------------------------|--------------|---------------------------------------------------|
| <i>DT DW</i>  | Disability weight for the diagnosis and treatment phase | Global Burden of Disease (GBD) 2010,[7] Begg et al 2007[8] | Merged GBD 2010 DWs (given for cancers overall) with the colorectal cancer DWs in Begg 2007. See text below and BODE <sup>3</sup> protocol.[9] | No                                             | 0.288 (applies for different time lengths depending on k <sup>th</sup> strata above) | Nil                           | n/a          | n/a                                               |
| <i>PT DW</i>  | Disability weight for the pre-terminal phase            | Global Burden of Disease (GBD) 2010,[7] Begg et al 2007[8] | Merged GBD 2010 DWs (given for cancers overall) with the colorectal cancer DWs in Begg 2007. See text below and BODE <sup>3</sup> protocol.[9] | No                                             | 0.539                                                                                | Nil                           | n/a          | n/a                                               |
| <i>T DW</i>   | Disability weight for the terminal phase                | Global Burden of Disease (GBD) 2010,[7] Begg et al 2007[8] | Merged GBD 2010 DWs (given for cancers overall) with the colorectal cancer DWs in Begg 2007. See text below and BODE <sup>3</sup> protocol.[9] | No                                             | 0.548                                                                                | Nil                           | n/a          | n/a                                               |

| VARIABLE NAME                                                     | VARIABLE DEFINITION                                                      | SOURCE                                               | DERIVATION FROM SOURCE & APPLICATION TO MODEL                                                                                                  | HETEROGENEITY BY AGE/SEX/ETHNICITY/DEPRIVATION | EXPECTED VALUE                                                        | UNCERTAINTY INTERVAL (95% UI) | DISTRIBUTION                             | SENSITIVITY of ICER to this variable <sup>1</sup> |
|-------------------------------------------------------------------|--------------------------------------------------------------------------|------------------------------------------------------|------------------------------------------------------------------------------------------------------------------------------------------------|------------------------------------------------|-----------------------------------------------------------------------|-------------------------------|------------------------------------------|---------------------------------------------------|
| <i>R DW</i>                                                       | Disability weight for the remission phase                                | Global Burden of Disease 2010,[7] Begg et al 2007[8] | Merged GBD 2010 DWs (given for cancers overall) with the colorectal cancer DWs in Begg 2007. See text below and BODE <sup>3</sup> protocol.[9] | No                                             | 0.167 (discounted at 20% per annum from end of year 1 post-diagnosis) | Nil                           | n/a                                      | n/a                                               |
| <b><i>Effect of CCC on increasing receipt of chemotherapy</i></b> |                                                                          |                                                      |                                                                                                                                                |                                                |                                                                       |                               |                                          |                                                   |
| <i>Prop surg only baseline →surg and chemo</i>                    | Proportion shifted from receiving surgery only to surgery + chemotherapy | Goodwin et al 2003[10] and expert estimates          | See text below                                                                                                                                 | No                                             | 0.33                                                                  | 0.09 to 0.65                  | Beta distribution (mean 0.33, s.d. 0.15) | 59%                                               |

| VARIABLE NAME                                             | VARIABLE DEFINITION                                                                                                                                                               | SOURCE                                                                                          | DERIVATION FROM SOURCE & APPLICATION TO MODEL                                                                                                                                        | HETEROGENEITY BY AGE/SEX/ETHNICITY/DEPRIVATION | EXPECTED VALUE                                                            | UNCERTAINTY INTERVAL (95% UI)      | DISTRIBUTION                                                                                                       | SENSITIVITY of ICER to this variable <sup>1</sup> |
|-----------------------------------------------------------|-----------------------------------------------------------------------------------------------------------------------------------------------------------------------------------|-------------------------------------------------------------------------------------------------|--------------------------------------------------------------------------------------------------------------------------------------------------------------------------------------|------------------------------------------------|---------------------------------------------------------------------------|------------------------------------|--------------------------------------------------------------------------------------------------------------------|---------------------------------------------------|
| <i>HR for chemo</i>                                       | Effect of chemotherapy with oxaliplatin on breast cancer mortality<br><br>(Effect of chemotherapy without oxaliplatin on breast cancer mortality considered as scenario analysis) | Sargent et al 2009[11]<br>De Gramont et al 2007[12]<br>Andre et al 2004[13]                     | See text below.<br>Product of two HRs: 1: effect of chemo without oxaliplatin compared to no chemo multiplied by 2: effect of chemo with oxaliplatin compared to without oxaliplatin | No                                             | 1: 0.72<br>2: 0.78                                                        | 1: 0.61 to 0.85<br>2: 0.63 to 0.98 | Log normal<br>1: mean of logs minus 0.33, s.d. of logs 0.05<br><br>2: mean of logs minus 0.2435, s.d. of logs 0.05 | 21%                                               |
| <b>Effect of CCC on reducing wait times to treatments</b> |                                                                                                                                                                                   |                                                                                                 |                                                                                                                                                                                      |                                                |                                                                           |                                    |                                                                                                                    |                                                   |
| ↓ in days to surgery                                      | Proportionate reduction in days to surgery due to a CCC                                                                                                                           | Haideri et al 2011[14] and expert estimates                                                     | See text below                                                                                                                                                                       | No                                             | 0.20                                                                      | 0.03 to 0.48                       | Beta distribution (mean 0.20, s.d. 0.121)                                                                          | 5%                                                |
| ↓ in EMR per day ↓ in time from diagnosis to surg         | Reduction in cancer excess mortality per day decrease in time from diagnosis to surgery (i.e. the effect of getting surgery faster on colon cancer mortality)                     | No direct evidence. Estimated using protocol[3], Whyte et al 2011[15], Tappenden et al 2007[16] | See text below                                                                                                                                                                       | No                                             | 0.9972 ratio decrease in excess mortality rate per day quicker to surgery | 0.9955 to 0.9987                   | Log normal (mean of logs minus 0.0028, s.d. of logs 0.0008)                                                        | 6%                                                |

| VARIABLE NAME                                             | VARIABLE DEFINITION                                                                                                                                                    | SOURCE                  | DERIVATION FROM SOURCE & APPLICATION TO MODEL | HETEROGENEITY BY AGE/SEX/ETHNICITY/DEPRIVATION | EXPECTED VALUE                                                                                    | UNCERTAINTY INTERVAL (95% UI) | DISTRIBUTION                                                | SENSITIVITY of ICER to this variable <sup>1</sup> |
|-----------------------------------------------------------|------------------------------------------------------------------------------------------------------------------------------------------------------------------------|-------------------------|-----------------------------------------------|------------------------------------------------|---------------------------------------------------------------------------------------------------|-------------------------------|-------------------------------------------------------------|---------------------------------------------------|
| ↓ <i>days to chemotherapy</i>                             | Proportionate reduction in average days from surgery to chemotherapy due to a CCC                                                                                      | Expert estimates        | See text below                                | No                                             | 0.20                                                                                              | 0.03 to 0.48                  | Beta distribution (mean 0.20, s.d. 0.121)                   | 63%                                               |
| ↓ <i>EMR per day ↓ in time from surg to chemo</i>         | Reduction in cancer excess mortality per day decrease in time from surgery to chemotherapy (i.e., the effect of getting chemotherapy faster on colon cancer mortality) | Biagi et al 2011[17]    | See text below                                | No                                             | 0.9953 ratio decrease in excess mortality rate per day quicker from diagnosis to initiating chemo | 0.9938 to 0.9969              | Log normal (mean of logs minus 0.0047, s.d. of logs 0.0008) | 43%                                               |
| <b>Effect of a CCC on reducing colon cancer morbidity</b> |                                                                                                                                                                        |                         |                                               |                                                |                                                                                                   |                               |                                                             |                                                   |
| ↓ <i>DW due to CCC</i>                                    | Reduction in disability weight during diagnosis and treatment phase due to a CCC reducing patient anxiety                                                              | Ferrante et al 2008[18] | See text below                                | No                                             | 0.67                                                                                              | 0.45 to 1.0                   | Log normal mean of logs minus 0.04, s.d. of logs 0.05       | 7%                                                |
| <b>Costs</b>                                              |                                                                                                                                                                        |                         |                                               |                                                |                                                                                                   |                               |                                                             |                                                   |

| VARIABLE NAME                                         | VARIABLE DEFINITION                                                                                                                                                              | SOURCE                                                                                               | DERIVATION FROM SOURCE & APPLICATION TO MODEL | HETEROGENEITY BY AGE/SEX/ETHNICITY/DEPRIVATION                                                          | EXPECTED VALUE        | UNCERTAINTY INTERVAL (95% UI) | DISTRIBUTION                    | SENSITIVITY of ICER to this variable <sup>1</sup> |
|-------------------------------------------------------|----------------------------------------------------------------------------------------------------------------------------------------------------------------------------------|------------------------------------------------------------------------------------------------------|-----------------------------------------------|---------------------------------------------------------------------------------------------------------|-----------------------|-------------------------------|---------------------------------|---------------------------------------------------|
| <i>Baseline health system costs per month</i>         | Routine health system costs per month (without a CCC) varying by time                                                                                                            | Health Tracker (linked NZ health datasets)                                                           | See Additional File 5                         | Yes by sex and age. Disaggregated by receipt of surgery alone (k=1) or surgery plus chemotherapy (k=2). | See Additional File 5 | Nil                           | n/a                             | n/a                                               |
| <i>Incremental CCC cost from diagnosis to surgery</i> | Incremental cost of CCC programme from provisional diagnosis to surgery (difference in costs for pathway of care with CCC minus pathway of care in business-as-usual comparator) | Consultation with local health care professionals (costed based on average salaries + 50% overheads) | See Additional File 4                         | No                                                                                                      | \$64.03 per patient   | \$29.42 to \$98.64            | Normal (mean 64.03, s.d. 17.66) | 6%                                                |

| VARIABLE NAME                                                     | VARIABLE DEFINITION                                                                                                                                                              | SOURCE                                                                                               | DERIVATION FROM SOURCE & APPLICATION TO MODEL | HETEROGENEITY BY AGE/SEX/ETHNICITY/DEPRIVATION | EXPECTED VALUE          | UNCERTAINTY INTERVAL (95% UI) | DISTRIBUTION                         | SENSITIVITY of ICER to this variable <sup>1</sup> |
|-------------------------------------------------------------------|----------------------------------------------------------------------------------------------------------------------------------------------------------------------------------|------------------------------------------------------------------------------------------------------|-----------------------------------------------|------------------------------------------------|-------------------------|-------------------------------|--------------------------------------|---------------------------------------------------|
| <i>Incremental CCC cost from surgery to start of chemotherapy</i> | Incremental cost of CCC programme from surgery to start of chemotherapy (difference in costs for pathway of care with CCC minus pathway of care in business-as-usual comparator) | Consultation with local health care professionals (costed based on average salaries + 50% overheads) | See Additional File 4                         | No                                             | \$5.00 per patient      | \$-10.39 to \$20.39           | Normal (mean 5.00, s.d. 7.85)        | 2%                                                |
| <i>Cost of chemotherapy per patient</i>                           | Cost per patient of 12 cycles of chemotherapy with oxaliplatin over 6 months                                                                                                     | Bottom-up costing approach including cost of pharmaceuticals, outpatient attendance and overheads.   | See Additional File 5                         | No                                             | \$17,811.78 per patient | \$14,494.69 to \$21,390.41    | Gamma (mean 17,811.78, s.d. 1781.18) | 40%                                               |



| <b>VARIABLE NAME</b>                   | <b>VARIABLE DEFINITION</b>                                          | <b>SOURCE</b>                                             | <b>DERIVATION FROM SOURCE &amp; APPLICATION TO MODEL</b>                                              | <b>HETEROGENEITY BY AGE/SEX/ETHNICITY/DEPRIVATION</b> | <b>EXPECTED VALUE</b> | <b>UNCERTAINTY INTERVAL (95% UI)</b> | <b>DISTRIBUTION</b>           | <b>SENSITIVITY of ICER to this variable<sup>1</sup></b> |
|----------------------------------------|---------------------------------------------------------------------|-----------------------------------------------------------|-------------------------------------------------------------------------------------------------------|-------------------------------------------------------|-----------------------|--------------------------------------|-------------------------------|---------------------------------------------------------|
| <i>Incremental dietitian costs</i>     | Additional costs from dietitian referrals precipitated by a CCC     | Expert estimates                                          | Dietitian referrals estimated to increase by 50% (2 contacts per referral. See Additional File 4      | No                                                    | \$115.89 per patient  | \$81.38 to \$141.16                  | Gamma (mean 115.9, s.d. 11.6) | 4%                                                      |
| <i>Incremental social worker costs</i> | Additional costs from social worker referrals precipitated by a CCC | Cancer Institute NSW Report 2011[19] and Expert estimates | Social worker referrals estimated to increase by 42%, 6 contacts per referral. See Additional File 4. | No                                                    | \$403.10 per patient  | \$327.95 to \$483.97                 | Gamma (mean 403, s.d. 40.3)   | 13%                                                     |

## 79 **Heterogeneity in the baseline model**

### 80 **Stage III colon cancer rates by demographic strata**

81 Elsewhere we describe how cancer incidence rates by socio-demographic groups were  
82 estimated[20], and the SEER stage distribution by sex, deprivation and ethnicity[3]. For this paper,  
83 we first estimated the incidence of colon cancer (previous estimates were for colorectal cancer  
84 combined) in 2011 by sex, age and ethnic group, by using a logistic regression model on NZCR data  
85 (1996 to 2008) to predict the odds (and thence the proportion) of colorectal cancer cases that were  
86 colon cancer. The regression model included main effects for sex, age (centred on 62.5, and  
87 modelled as a linear term), ethnicity (Māori and non-Māori), deprivation (deciles 1-3, 4-7 and 8-10),  
88 and calendar year.

89 Next, we estimated the proportion of all colon cancer cases that were stage III cancer cases, using  
90 data from the Differential Colon Cancer Survival by Ethnicity in New Zealand project  
91 ([www.uow.otago.ac.nz/coloncancer-info.html](http://www.uow.otago.ac.nz/coloncancer-info.html)) [5]. This was done by using a second logistic  
92 regression model on observations with complete staging data. The dependent variable was stage III  
93 (compared to 'rest'), and the independent variables were as above. The final model coefficients are  
94 also shown in Table 2 below.

95 **Table 2: Logistic regression coefficients (and 95% confidence intervals) for models**  
 96 **predicting the odds of being colon cancer and stage III colon cancer**

|                             | <b>Model predicting colon cancer among all colorectal cancer cases ‡</b> | <b>Model predicting stage III colon cancer among all colon cancer cases §</b> |
|-----------------------------|--------------------------------------------------------------------------|-------------------------------------------------------------------------------|
| <b>Variable</b>             | <b>Coefficient (95% CI)</b>                                              | <b>Coefficient (95% CI)</b>                                                   |
| Intercept                   | 0.405 (0.359 to 0.452)                                                   | -0.124 (-0.638 to 0.383)                                                      |
| Sex (female = ref)          | 0.476 (0.438 to 0.513)                                                   | -0.374 (-0.728 to -0.021)                                                     |
| Age†                        | 0.012 (0.010 to 0.014)                                                   | -0.004 (-0.019 to 0.011)                                                      |
| Ethnicity (non-Māori = ref) | -0.322 (-0.433 to -0.210)                                                | -0.191 (-0.590 to 0.205)                                                      |
| Dep 4-7 (Dep 1-3 = ref)     | 0.003 (-0.042 to 0.048)                                                  | -0.283 (-0.787 to 0.226)                                                      |
| Dep 8-10 (Dep 1-3 = ref)    | -0.048 (-0.098 to 0.002)                                                 | -0.309 (-0.814 to 0.203)                                                      |
| Diagnosis year*             | 0.003 (0.000 to 0.005)                                                   | 0.025 (-0.055 to 0.104)                                                       |
| Sample size                 | 51156                                                                    | 589                                                                           |

97 Dep = neighbourhood deprivation decile

98 † Centred at 62.5 years of age. ‡Model used 1996 onwards colorectal cancer cases from the cancer registry.

99 § Modelled used data from the Differential Colon Cancer Survival by Ethnicity in New Zealand project where TNM staging  
 100 was determined by notes review. \*Diagnosis year is centred at 2003.

101  
 102 The intercept of the first logistic regression model gives the estimate of the odds of 1.501 (i.e.  
 103  $\exp[0.405]$ ) for colon cancer to non-colon cancer among all colorectal cancers for the reference  
 104 individual, i.e. age 62.5, female, non-Māori, Deprivation deciles 1 to 3, diagnosis year 2003. As a  
 105 proportion of all colorectal cancers, this is  $1.501 / (1+1.501) = 0.600$ .

106 The second model then estimates the odds (and hence the proportion) of all colon cancer cases that  
 107 were stage III in 2003 by joint strata of sex, age and ethnicity (Table 2; we assume this 2003  
 108 proportion applies to the 2011 baseline data). These proportions were then multiplied together,  
 109 then multiplied into 2011 estimated colorectal cancer incidence rates to get 2011 estimated colon  
 110 cancer rates, and then again into the estimated population counts in 2011 to give counts for 2011  
 111 (Table 3).

112

113 **Table 3: Estimated stratum specific proportions of colorectal cancer cases that are colon**  
 114 **cancer, and colon cancer cases that are stage III, and estimated rates and counts of stage**  
 115 **III colon cancer (estimates for deprivation deciles 4-7 presented only)**

| Age groups                                                        | Males |           | Females |           |
|-------------------------------------------------------------------|-------|-----------|---------|-----------|
|                                                                   | Māori | Non-Māori | Māori   | Non-Māori |
| <i>Proportions of colorectal cancer that are colon cancer</i>     |       |           |         |           |
| 45-49                                                             | 0.593 | 0.668     | 0.476   | 0.556     |
| 50-54                                                             | 0.608 | 0.681     | 0.490   | 0.570     |
| 55-59                                                             | 0.622 | 0.694     | 0.505   | 0.585     |
| 60-64                                                             | 0.636 | 0.706     | 0.520   | 0.599     |
| 65-69                                                             | 0.649 | 0.719     | 0.535   | 0.613     |
| 70-74                                                             | 0.663 | 0.730     | 0.550   | 0.627     |
| 75-79                                                             | 0.676 | 0.742     | 0.564   | 0.641     |
| 80-84                                                             | 0.689 | 0.753     | 0.579   | 0.655     |
| 85-89                                                             | 0.701 | 0.764     | 0.593   | 0.668     |
| 90+                                                               | 0.713 | 0.774     | 0.607   | 0.681     |
| <i>Proportions of colon cancer that are stage III</i>             |       |           |         |           |
| 45-49                                                             | 0.288 | 0.329     | 0.37    | 0.416     |
| 50-54                                                             | 0.284 | 0.324     | 0.365   | 0.410     |
| 55-59                                                             | 0.279 | 0.319     | 0.360   | 0.405     |
| 60-64                                                             | 0.275 | 0.315     | 0.355   | 0.400     |
| 65-69                                                             | 0.271 | 0.310     | 0.350   | 0.395     |
| 70-74                                                             | 0.267 | 0.306     | 0.345   | 0.390     |
| 75-79                                                             | 0.262 | 0.301     | 0.341   | 0.385     |
| 80-84                                                             | 0.258 | 0.297     | 0.336   | 0.380     |
| 85-89                                                             | 0.254 | 0.292     | 0.331   | 0.375     |
| 90+                                                               | 0.250 | 0.288     | 0.326   | 0.370     |
| <i>Rates (per 100,000)</i>                                        |       |           |         |           |
| 45-49                                                             | 4.2   | 4.8       | 3.7     | 5.5       |
| 50-54                                                             | 7.8   | 9.1       | 6.4     | 9.6       |
| 55-59                                                             | 14.9  | 17.7      | 11.3    | 17.0      |
| 60-64                                                             | 27.8  | 33.5      | 19.3    | 29.5      |
| 65-69                                                             | 48.9  | 59.6      | 32.2    | 50.1      |
| 70-74                                                             | 77.9  | 96.3      | 51.3    | 80.9      |
| 75-79                                                             | 102.1 | 128.4     | 66.3    | 106.0     |
| 80-84                                                             | 115.6 | 147.8     | 79.5    | 128.8     |
| 85-89                                                             | 115.8 | 147.4     | 80.2    | 129.6     |
| 90+                                                               | 116.0 | 147.3     | 80.8    | 130.4     |
| <i>Counts (rates applied to projected 2011 census population)</i> |       |           |         |           |
| 45-49                                                             | 0.26  | 2.64      | 0.25    | 3.19      |
| 50-54                                                             | 0.42  | 4.68      | 0.38    | 5.21      |
| 55-59                                                             | 0.59  | 8.04      | 0.48    | 8.15      |
| 60-64                                                             | 0.85  | 14.50     | 0.61    | 13.54     |
| 65-69                                                             | 0.96  | 20.28     | 0.69    | 18.15     |
| 70-74                                                             | 1.14  | 26.66     | 0.82    | 24.74     |
| 75-79                                                             | 0.81  | 25.86     | 0.65    | 25.07     |
| 80-84                                                             | 0.50  | 22.58     | 0.44    | 26.04     |
| 85-89                                                             | 0.16  | 11.97     | 0.19    | 17.79     |
| 90+                                                               | 0.03  | 3.05      | 0.06    | 6.58      |

116

117 The cross-classified data in Table 3 was used to specify the heterogeneity distribution, of any sex by  
118 age by ethnic group by deprivation.

119 **Stage III colon cancer rates and counts by socio-demographic and baseline clinical strata**

120 Having estimated the stage III colon cancer rates and counts by demographic strata, there is one  
121 more step to establish the baseline (i.e. pre-intervention) set of rates, namely to disaggregate  
122 further by receipt of surgery and chemotherapy.<sup>2</sup>

123 Regarding pre-existing data, Hill et al found that 95.8% of Māori with colon cancer (95% CI 93.1-98.5)  
124 were offered surgery versus 96.2% (95%CI 94.0-98.5) of non-Māori. They also found that 0.7% (95%  
125 CI 0.2-2.3) of Māori and 0.8% (95% CI 0.3-2.2) of non-Māori decline surgery[21]. Given the small  
126 numbers of people not receiving surgery, we simply assume that everyone received surgery.

127 Determining the distribution of surgery only and both surgery and chemotherapy receipt was  
128 conducted by fitting a logistic regression model to just the stage III colon cancer data set. The same  
129 specification of independent variables was used as above for the logistic regression model predicting  
130 the odds of stage III colon cancer. The output is shown in Table 4 below.

---

<sup>2</sup> Consideration was given to including comorbidity as a predictor of receipt, and indeed as separate strata in the model. However, this was deemed unnecessary; the method we outline in the sections below captures the mortality difference between the receipt categories below due to comorbidities (in addition to the treatment effect per se), but only models the treatment effect of either surgery or chemotherapy as part of the intervention. Thus it was possible to not explicitly include comorbidity in the model, improving model parsimony.

131 **Table 4: Logistic regression coefficients (and 95% confidence intervals) for model**  
 132 **predicting the odds of being either surgery, compared to both surgery and chemotherapy.**

| Variable                    | Surgery only cf both surgery and chemotherapy |
|-----------------------------|-----------------------------------------------|
| Intercept                   | -1.938 (-3.019 to -0.949)                     |
| Sex (female = ref)          | -0.122 (-0.800 to 0.551)                      |
| Age†                        | 0.112 (0.077 to 0.152)                        |
| Ethnicity (non-Māori = ref) | 0.991 (0.216 to 1.808)                        |
| Dep 4-7 (Dep 1-3 = ref)     | 0.363 (-0.611 to 1.356)                       |
| Dep 8-10 (Dep 1-3 = ref)    | 0.412 (-0.564 to 1.41)                        |
| Diagnosis year*             | -0.220 (-0.388 to -0.061)                     |
| Sample size                 | 189                                           |

133 Model used data from the Differential Colon Cancer Survival by Ethnicity in New Zealand project where TNM staging was  
 134 determined by notes review.

135 † Centred at 62.5 years of age

136 \*Diagnosis year is centred at 2003.

137

138 Exponentiating the intercept of the model gives the odds of surgery, to surgery and chemotherapy

139 of 0.144 for the reference patient, or a proportion of  $0.144/1.144=0.126$ . This regression output was

140 then used to estimate the stratum specific proportions, and multiplied into the rates and counts in

141 Table 3 to generate rates and counts by baseline clinical strata as shown in Table 5.

142 **Table 5: Estimated stratum specific proportions of baseline-receipt of treatment (strata j:**  
 143 **1=surgery, 2=surgery and chemo) among stage III colon cancer patients (for base year**  
 144 **2011; estimates for deprivation deciles 4-7 presented only)**

| Age groups         | Males  |       |           |       | Females |       |           |       |
|--------------------|--------|-------|-----------|-------|---------|-------|-----------|-------|
|                    | Māori  |       | Non-Māori |       | Māori   |       | Non-Māori |       |
|                    | j=1    | j=2   | j=1       | j=2   | j=1     | j=2   | j=1       | j=2   |
| <i>Proportions</i> |        |       |           |       |         |       |           |       |
| 45-49              | 0.0804 | 0.920 | 0.0314    | 0.969 | 0.089   | 0.910 | 0.0353    | 0.965 |
| 50-54              | 0.133  | 0.867 | 0.0536    | 0.946 | 0.147   | 0.853 | 0.0602    | 0.940 |
| 55-59              | 0.211  | 0.789 | 0.0902    | 0.910 | 0.232   | 0.768 | 0.101     | 0.899 |
| 60-64              | 0.318  | 0.682 | 0.148     | 0.852 | 0.345   | 0.655 | 0.164     | 0.836 |
| 65-69              | 0.449  | 0.551 | 0.232     | 0.768 | 0.480   | 0.520 | 0.255     | 0.745 |
| 70-74              | 0.588  | 0.412 | 0.346     | 0.654 | 0.617   | 0.383 | 0.374     | 0.626 |
| 75-79              | 0.714  | 0.286 | 0.481     | 0.519 | 0.738   | 0.262 | 0.511     | 0.489 |
| 80-84              | 0.813  | 0.187 | 0.618     | 0.382 | 0.831   | 0.169 | 0.646     | 0.354 |
| 85-89              | 0.884  | 0.116 | 0.739     | 0.261 | 0.896   | 0.104 | 0.762     | 0.238 |
| 90+                | 0.930  | 0.070 | 0.832     | 0.168 | 0.938   | 0.062 | 0.848     | 0.152 |

145

146 The cross-classified data in Table 5 was used to sample in the Monte Carlo inner loop whether

147 patients had surgery only or surgery and chemotherapy.

148 **Clinical transition time: diagnosis to surgery; surgery to chemotherapy**

149 For the micro-simulation trials of individual variability, it is necessary to have a range of times to  
150 sample from for each of: diagnosis to surgery; and surgery to beginning of chemotherapy. These are  
151 estimable from the colon cancer study data  
152 (<http://www.otago.ac.nz/wellington/research/cancercontrol/projects/otago019908.html>) [5].

153 **Figure 2: Histogram of time from diagnosis to surgery (excluding those with zero days**  
154 **(22.6%) due to diagnosis at surgery or emergency presentation) for 146 stage III colon**  
155 **cancer patients**

156

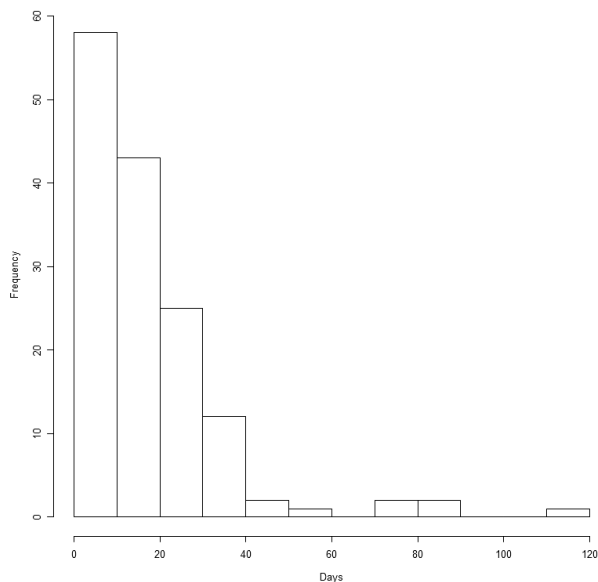

157

158 Source: data from the Differential Colon Cancer Survival by Ethnicity in New Zealand

159 Figure 2 above shows a simple histogram of time to surgery from the colon cancer dataset; the  
160 distribution is highly right-skewed. A logistic regression was run on those 22.6% with zero days from  
161 diagnosis to surgery (prior to excluding them) and no statistical significance was found for age, sex,  
162 ethnicity, deprivation or diagnosis year.

163 Figure 3 below shows a simple histogram of time from surgery to receipt of chemotherapy; the  
164 distribution is also skewed, but with a clearer mode rather than a near-exponential distribution of  
165 the time to surgery.

166 **Figure 3: Histogram of time from surgery to chemotherapy for 98 stage III colon cancer**  
167 **patients**

168

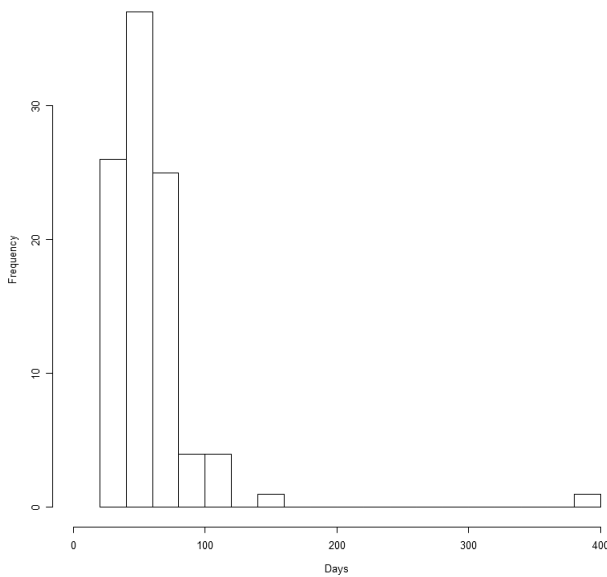

169

170 Source: data from the Differential Colon Cancer Survival by Ethnicity in New Zealand

171 Two gamma regression models were run for time to surgery and then time from surgery to  
172 chemotherapy, with predictors of sex, age group and ethnicity. (Deprivation was not included as it  
173 was not significant. We also tried including a coefficient for the number of days from diagnosis to  
174 surgery in the second model, so that dependencies can be explicitly modelled. However, it was non-  
175 significant and dropped from the final model.) Results are shown in Table 6 below.

176



177 **Table 6: Gamma regression coefficients (and 95% confidence intervals) for a log-link**  
 178 **function model predicting the number of days from diagnosis to surgery, and from surgery**  
 179 **to receipt of chemotherapy.**

| Variable                       | Coefficient (95% CI)           |                                   |
|--------------------------------|--------------------------------|-----------------------------------|
|                                | Days from diagnosis to surgery | Days from surgery to chemotherapy |
| Intercept                      | 2.714 (2.368 to 3.079)         | 3.995 (3.708 to 4.293)            |
| Sex                            | 0.271 (-0.026 to 0.57)         | 0.099 (-0.154 to 0.354)           |
| Age†                           | 0.014 (0.000 to 0.027)         | 0.006 (-0.006 to 0.018)           |
| Ethnicity (Māori cf non-Māori) | 0.303 (-0.011 to 0.62)         | 0.293 (0.024 to 0.565)            |
| Diagnosis year *               | 0.065 (-0.006 to 0.136)        | 0.036 (-0.03 to 0.10)             |
| Sample size                    | 146                            | 98                                |
| Random error variance          | 0.826                          | 0.400                             |

180 The model used data from the Differential Colon Cancer Survival by Ethnicity in New Zealand project where TNM staging  
 181 was determined by notes review, and excludes those with missing data on any covariates and no receipt of surgery and no  
 182 receipt of chemotherapy (respectively).

183 † Centred at 62.5 years of age

184 \*Diagnosis year is centred at 2003.

185  
 186 Time to surgery and time to chemotherapy were modelled as stochastic uncertainty in the economic  
 187 decision model, and in order to retain heterogeneity by socio-demographic strata we created CDFs  
 188 for each possible socio-demographic group. It was simplest to operationalise in TreeAge Pro using  
 189 parametrically specified gamma distributions for each socio-demographic group. Therefore, we  
 190 conducted simulations in R using the above regression equations to produce 10000 predictions for  
 191 each possible combination of sex by age by ethnicity. (Note that these simulations included random  
 192 draws from the error term distribution as well as the distribution about each coefficient, generating  
 193 an individual-level distribution of times to event – not ‘just’ the average or expected value in each  
 194 socio-demographic strata.) The alpha and beta parameters, and average days, are shown in Table 7  
 195 below.

196  
197

**Table 7: Estimated stratum specific gamma distribution for time to surgery and time from surgery to chemotherapy (alphas, beta (average days))**

| Age group                                | Males           |                 | Females         |                 |
|------------------------------------------|-----------------|-----------------|-----------------|-----------------|
|                                          | Non-Māori       | Māori           | Non-Māori       | Māori           |
| <i>Time to surgery from diagnosis</i>    |                 |                 |                 |                 |
| 45-49                                    | 1.08, 15.3 (17) | 1.16, 19.2 (22) | 1.09, 11.5 (13) | 1.15, 14.6 (17) |
| 50-54                                    | 1.15, 15.1 (17) | 1.16, 20.5 (24) | 1.15, 11.4 (13) | 1.17, 15.3 (18) |
| 55-59                                    | 1.14, 16.5 (19) | 1.16, 22.0 (26) | 1.15, 12.2 (14) | 1.14, 16.6 (19) |
| 60-64                                    | 1.14, 17.5 (20) | 1.15, 23.5 (27) | 1.18, 13.0 (15) | 1.22, 16.9 (21) |
| 65-69                                    | 1.17, 18.4 (22) | 1.12, 25.6 (29) | 1.13, 14.5 (16) | 1.16, 19.2 (22) |
| 70-74                                    | 1.14, 19.9 (23) | 1.17, 26.6 (31) | 1.18, 15.2 (18) | 1.16, 20.5 (24) |
| 75-79                                    | 1.13, 21.7 (25) | 1.20, 27.3 (33) | 1.14, 16.4 (19) | 1.12, 22.6 (25) |
| 80-84                                    | 1.16, 23.1 (27) | 1.11, 32.3 (36) | 1.13, 17.8 (20) | 1.12, 24.2 (27) |
| 85-89                                    | 1.12, 25.3 (28) | 1.05, 36.5 (38) | 1.14, 19.3 (22) | 1.12, 26.1 (29) |
| 90+                                      | 1.11, 26.7 (30) | 1.10, 36.2 (40) | 1.13, 19.7 (22) | 1.13, 26.7 (30) |
| <i>Time from surgery to chemotherapy</i> |                 |                 |                 |                 |
| 45-49                                    | 4.13, 13.4 (55) | 4.38, 16.9 (74) | 4.25, 11.9 (51) | 4.47, 15.1 (67) |
| 50-54                                    | 4.31, 13.2 (57) | 4.38, 17.7 (78) | 4.37, 11.8 (52) | 4.53, 15.2 (69) |
| 55-59                                    | 4.42, 13.4 (59) | 4.42, 17.9 (79) | 4.48, 11.8 (53) | 4.73, 15.1 (71) |
| 60-64                                    | 4.54, 13.4 (61) | 4.40, 18.3 (81) | 4.53, 12.1 (55) | 4.55, 16.1 (73) |
| 65-69                                    | 4.56, 13.7 (62) | 4.44, 18.7 (83) | 4.46, 12.6 (56) | 4.58, 16.2 (74) |
| 70-74                                    | 4.50, 14.3 (64) | 4.35, 20.0 (87) | 4.58, 12.7 (58) | 4.52, 17.3 (78) |
| 75-79                                    | 4.47, 15.0 (67) | 4.18, 21.6 (90) | 4.51, 13.2 (60) | 4.35, 18.6 (81) |
| 80-84                                    | 4.29, 15.9 (68) | 4.07, 22.5 (92) | 4.20, 14.8 (62) | 4.19, 20.0 (84) |
| 85-89                                    | 4.13, 17.2 (71) | 4.04, 23.6 (95) | 4.14, 15.6 (65) | 3.92, 21.9 (86) |
| 90+                                      | 4.12, 17.6 (73) | 3.82, 25.4 (97) | 3.96, 16.7 (66) | 3.85, 23.0 (89) |

198

199 By way of visualising these distributions, four examples using the above alpha and beta values are  
 200 shown in Figure 4. These gamma distributions were then converted to CDFs for sampling from in the  
 201 DES.

202

203 **Figure 4: Estimated gamma distributions using output in Table 7 for:**

**Time to surgery, non-Māori 55-59 yr. female**

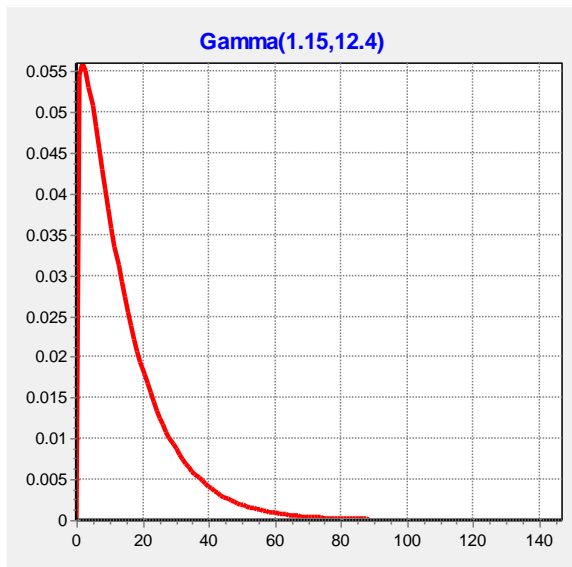

**Time to surgery, Māori 70-74 yr. male**

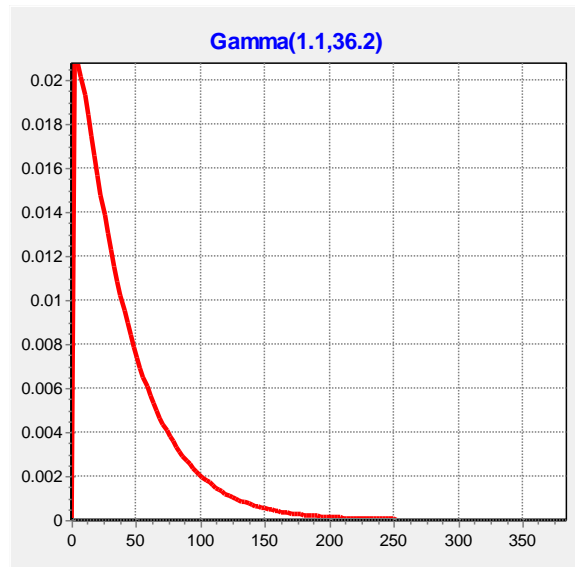

**Surg to chemo, non-Māori 55-59 yr. female**

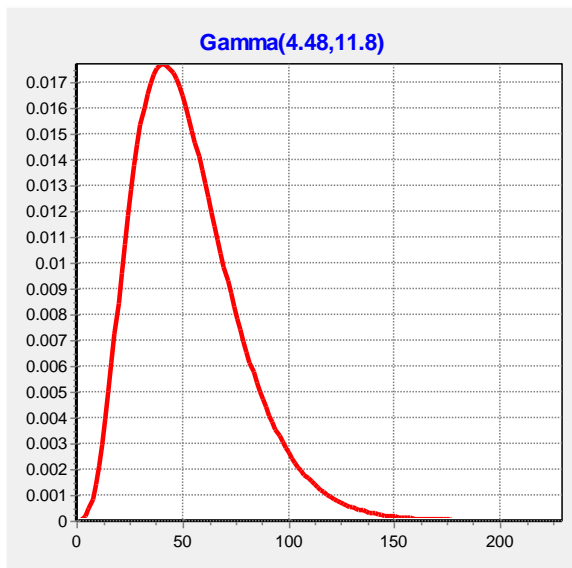

**Surgery to chemo, Māori 70-74 yr. male**

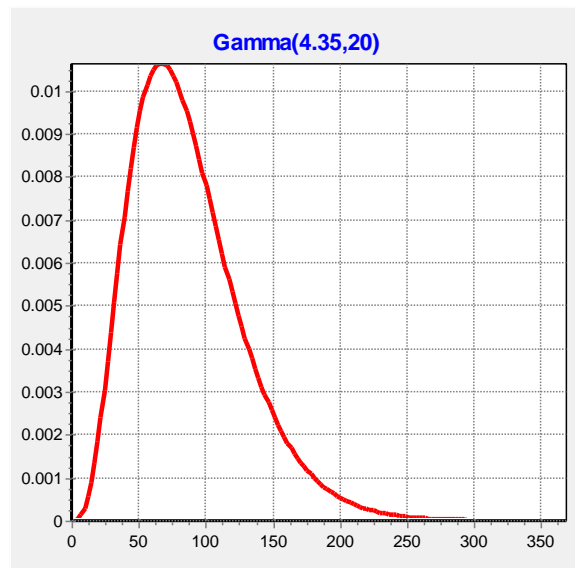

204

205 **Excess mortality rates by socio-demographic (i) and clinical (j) strata**

206 We first estimated the excess mortality rate (EMR; cancer consequent mortality rate[22]) for stage III

207 colon cancer by the socio-demographic strata (but not yet the clinical strata). Elsewhere, we have

208 used excess mortality rate modelling, with cubic splines to model mortality by month post-diagnosis,

209 for SEER regional cancer, by socio-demographics for cases diagnosed from 1994-2008 with mortality  
 210 follow-up up to December 2010[3]. This modelling also included a term for calendar year that  
 211 predicted a 3.5% per annum reduction in EMRs (presumably due to improved management and  
 212 treatment); we assumed this trend continued to our base-year of 2011.

213 For the microsimulation, we converted the EMR functions into cumulative EMR (CEMR) functions  
 214 (see Figure 5 below). Where the CEMR asymptotes give the fraction of cases dying from their cancer  
 215 (or one minus the proportion cured). For example, over 60% of Māori females aged 75 years and  
 216 older die from their colon cancer (allowing for competing mortality risk), but fewer New Zealand  
 217 European do. In the microsimulation, each trial involves a random draw from a uniform 0/1  
 218 distribution. Using older Māori females, a random draw of 0.70 means she survived the colon cancer  
 219 (if surviving the competing other causes of death), and a random draw of 0.2 means that she will die  
 220 within the first year of colon cancer – at a given number of days post diagnosis in the baseline at  
 221 least.

222 **Figure 5: Cumulative distribution of time of death from cancer,  $P(T < t)$ , used to sample**  
 223 **time to death from cancer in the discrete event simulation, for females, NZDep 4-7.**

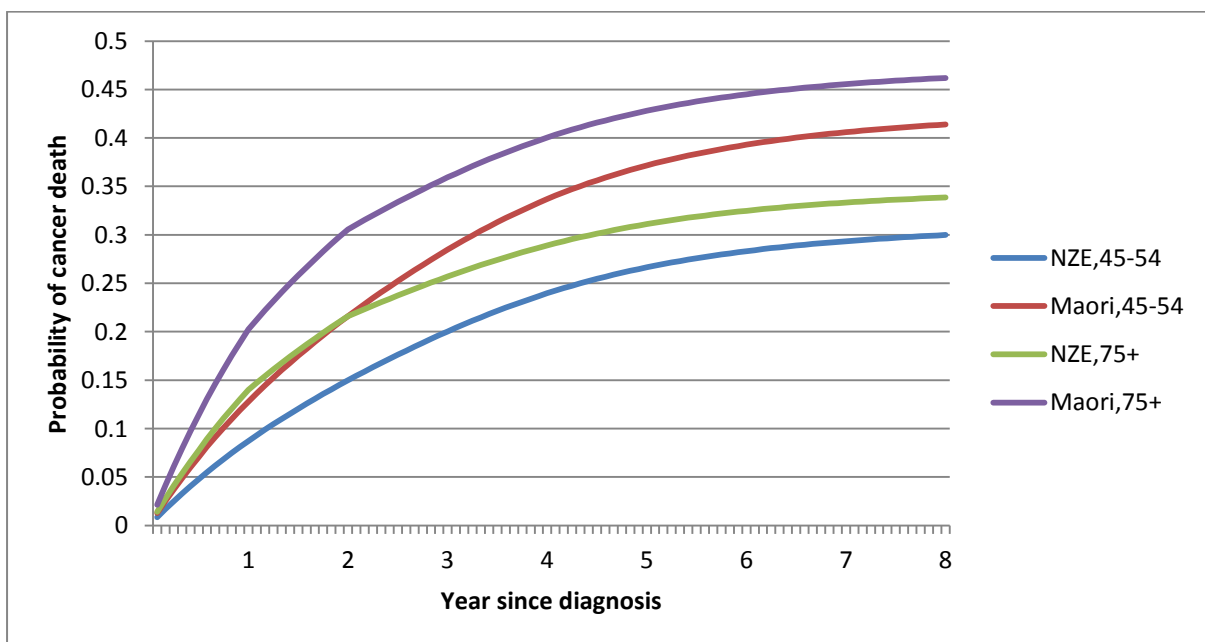

224

225 NZE = New Zealand European

226

227 The *shape* of the EMR curve (being the slope of the above CDF curves) post-diagnosis varies by  
 228 stage. Among those with distant or advanced stage the EMR is high at the outset, but among those  
 229 with regional or local cancer it is initially low then increases. Ideally, we would like to know the  
 230 shape of the EMR curve for the stage III subset of SEER regional cancers. However, it would be  
 231 challenging to do so, and probably not particularly influential on final outputs – so we assume that  
 232 the shape of the EMR curve for SEER regional cases is the same for stage III. Second, analyses on the  
 233 colon cancer study data  
 234 (<http://www.otago.ac.nz/wellington/research/cancercontrol/projects/otago019908.html>)[5] failed  
 235 to show any statistically significant differences in hazard ratios between stages IIa, IIb and III (which  
 236 are all subsumed in the SEER regional category). Thus, we simply use the EMRs for SEER regional as  
 237 direct estimates for stage III.

238 Thus, we now have EMR for stage III by socio-demographic strata, *i*. We then disaggregated further  
 239 by clinical strata, *j*, using the following approach. A Cox proportional hazards model on the New  
 240 Zealand colon cancer data was run, but now restricted to just stage III and adjusting for sex, age,  
 241 ethnicity and deprivation (deciles 1-3, 4-7 and 8-10 grouped), to determine hazard ratios for surgery  
 242 only (*j*=1) compared to both surgery and chemotherapy (*j*=2). Then the EMR for each socio-  
 243 demographic *i* acted as a weighted average of the EMRs for each clinical strata *j*, where the weights  
 244 are the proportion of colon cancer cases in each *j* stratum:

$$245 \quad EMR[III]_i^t = EMR[III]_{i,j=2}^t \times HR[j = 1:j = 2] \times P[j = 1|III]_i$$

$$+ EMR[III]_{i,j=2}^t \times P[j = 2|III]_i$$

$$\xrightarrow{yields} EMR[III]_{i,j=2}^t = \frac{EMR[III]_i^t}{P[j = 2|III]_i + (HR[j = 1:j = 2] \times P[j = 1|III]_i)}$$

246

247 Where:

248  $EMR[III]_{i,j}^t$  = the excess mortality rate for clinical strata j within socio-demographic  
249 strata i at time t post diagnosis

250  $HR[j = 1:j = 2]$  = hazard ratio for clinical stratum j=1 compared to j=2 (from Cox  
251 proportional hazards model), assumed uniform across socio-demographic  
252 stratum as 2.30 (95%CI 1.37 - 3.86); note, however, that we do not model  
253 uncertainty in the HR).

254  $P[j = 1,2|III]_i$  = proportion of colon cases in socio-demographic stratum i that are in one  
255 of clinical strata j=1 or 2 (see Table 5)

256 **Figure 6: Kaplan Meier curves showing survival function for patients who received surgery**  
257 **and chemotherapy (red line; j=2) and surgery only (green; j=1) with 95% confidence**  
258 **intervals.**

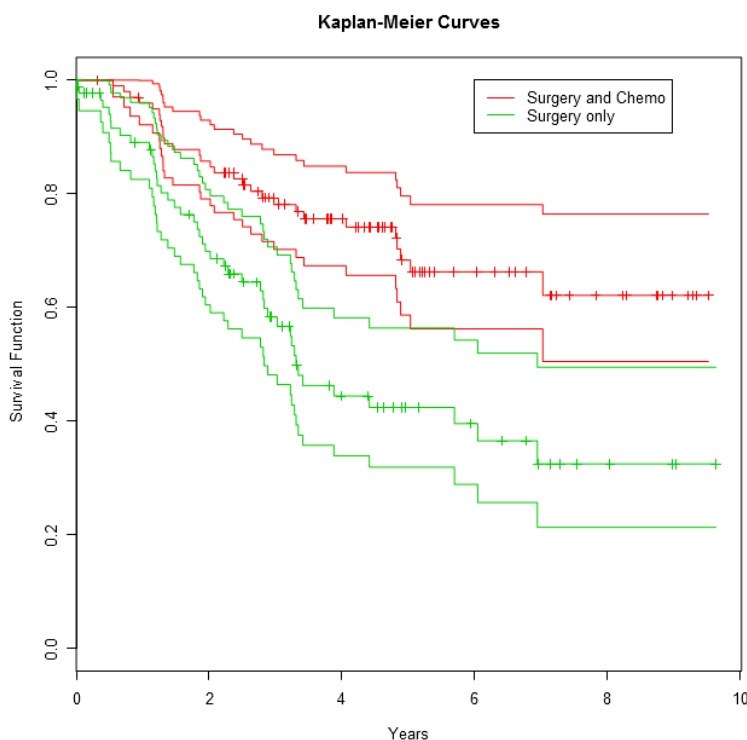

259

260 Having calculated  $EMR[III]_{i,j=2}^t$  it is then straight forward to calculate  $EMR[III]_{i,j=1}^t$  using the  
261 hazard ratios.

## 262 **Morbidity**

263 We utilised morbidity or disability weights (DW) from the Global Burden of Disease 2010 study[7] ,  
264 and mathematically integrated these into our cancer models (i.e. the average of DWs across all  
265 cancers was forced to be that in the GBD)[9]. These assume a morbidity weight of 0.288 for a 9  
266 month diagnosis and treatment (DT) state, and 0.167 for remission for colorectal cancer (see Table 1  
267 in main paper). Note, however, that for this economic decision model that explicitly models an  
268 intervention that reduces time through phases, the duration of the DT phase will be that predicted  
269 for time to surgery plus time to start of chemotherapy plus six months (the latter fixed as the time  
270 for course of chemotherapy). If dying from colon cancer, the person is assumed to have a month in a  
271 terminal state (DW=0.548) and three months prior to that in a pre-terminal state (DW=0.539). Note  
272 that we do not explicitly and mathematically model transitions into these states, but rather we  
273 model time to death from cancer (and then allow for these fixed times in pre-terminal and terminal  
274 states in the mathematical calculation of  $QALYs^{DW}$ ).

275 In addition to the disease model morbidity weights, we also allow for expected background  
276 population morbidity by taking the average total disability in the population at each sex, age and  
277 ethnic combination from the New Zealand BDS (personal communication, Dr Martin Tobias, Ministry  
278 of Health, 2012). This value or 'average morbidity weight' is sometimes referred to as the prevalent  
279 years of live with disability (pYLD); we will use this nomenclature. If, for example, the pYLD was 0.10  
280 for a given sex, age and ethnic group, and a person was in a terminal state, then the total disability is  
281 neither  $0.10 + 0.548 = 0.648$ , nor 'just' 0.548. Rather, it is  $1 - (1-0.548) \times (1-0.10) = 0.5932$ . The  
282 derivation and values of these pYLDs are described elsewhere.[9]

## 283 Intervention parameters

### 284 The proportion of people receiving surgery only in the comparator who additionally receive 285 chemotherapy with the intervention

286 Regarding receipt of adjuvant chemotherapy, the oxaliplatin-based regimen FOLFOX (folinic acid  
287 (leucovorin) + fluorouracil (5-FU) + oxaliplatin) is recommended by the New Zealand Guidelines  
288 Group for stage III colon cancer[23]. However, it is likely there is a moving trend to prescribing  
289 capecitabine with oxaliplatin using the CAPOX (also known as XELOX) regimen over FOLFOX due to  
290 its predominantly oral route of administration (personal communication with clinical nurse  
291 specialist, medical oncologist, and oncology pharmacist separately). Both CAPOX and FOLFOX have  
292 the same efficacy as both are fluorouracil based however their toxicity profiles differ[24].

293 The only contraindications to receiving FOLFOX are: known hypersensitivity, pregnant patients,  
294 debilitated patients and patients with severe renal impairment (creatinine clearance <30mL/min)  
295 [25-28]. Precautions for prescribing FOLFOX include: mild renal impairment, hepatic impairment,  
296 pernicious anaemia and being 70 years of age or older and female. Factors that will delay treatment  
297 with chemotherapy post-operatively include: post-operative complications such as sepsis (8.9%  
298 occurrence in Māori vs 6.7% in non-Māori), pneumonia (7.2% occurrence in Māori vs 4.9% in non-  
299 Māori)[21] and bone marrow suppression which is unlikely unless the patient is receiving  
300 immunosuppressant therapy (or previous chemotherapy recently).

301 Therefore, comorbidities may be a valid reason for some people to not receive chemotherapy, but  
302 not to the extent of the reported low coverage[29]. Note this is the most recent estimate available  
303 on coverage of chemotherapy for colon cancer patients in New Zealand however we expect  
304 coverage to have improved since the implementation of multi-disciplinary team meetings. Based on  
305 the information provided by Medsafe for each chemotherapy agent and discussions with one of our  
306 clinical advisors (medical oncologist), we assume that an excess of 95% of people aged up to 65 who



307 receive surgery should be eligible for chemotherapy, with eligibility falling to 90% for those aged 65-  
308 69, 85% for those aged 70-74, 80% for those aged 75-79 and 75% for those aged 80 and above.

309 This places a limit on the potential increase in people receiving chemotherapy with the intervention.  
310 We accommodate this in the model by first calculating the number of people in stratum  $j=1$  that  
311 remain as eligible. For example, consider 80-84 year old Māori males in Table 5. In business-as-usual,  
312 81.3% do not receive chemotherapy and 18.7% do. The assumptions in the above paragraph are that  
313 75% are actually eligible, or 25% ineligible. Therefore,  $81.3\% - 25\% = 56.3\%$  of Māori males aged 80-  
314 84 are estimated to be eligible for chemotherapy, but did not receive it. We return to this example  
315 below, after considering the evidence of the effect of CCC on increasing uptake among this 56.3%.

316 In order to estimate the effect size of a CCC programme on increasing coverage of chemotherapy in  
317 cancer patients a systematic literature search was conducted in Ovid MEDLINE (R), the Database of  
318 Abstracts of Reviews of Effects, the HTA (health technology assessment) database, the Cochrane  
319 Library, the New Zealand Ministry of Health publications and NHS EED (NHS Economic Evaluation  
320 Database). The explicit search strategy, including keywords, MeSH terms and the inclusion and  
321 exclusion criteria are documented in Additional File 3. Of the 317 systematic reviews retrieved from  
322 databases, 293 were excluded after relevance screening and the remaining 24 were excluded for not  
323 meeting our inclusion criteria as they did not have suitable outcomes to answer our research  
324 question. One paper [10] was retrieved from 'snowballing' from a systematic review (not produced  
325 by our systematic search) on case management[30]. This paper is not a systematic review and  
326 therefore did not meet our inclusion criteria in this regard however it meets our inclusion criteria in  
327 all other aspects (i.e. a suitable intervention to address our research question).

328 We are unable to find any other studies that have looked at a nurse-led intervention changing  
329 coverage of chemotherapy following surgery. We have found studies measuring impact of nurse-led  
330 care on coverage of palliative care services and hospices but these do not meet our inclusion criteria  
331 as they are evaluating a different point in the care pathway.

332 The Goodwin et al study [10] measured the effect of a CCC type intervention on improving receipt of  
333 chemotherapy for patients with breast cancer. The intervention in this study is similar to the  
334 intervention we have specified (although more intensive) and had no other system-wide  
335 intervention being introduced simultaneously. The study was of high internal validity although the  
336 results were borderline statistically significant. It is a randomised prospective trial for women aged  
337 65 or older, newly diagnosed with breast cancer, who received nurse case management for 12  
338 months post diagnosis in the intervention arm compared to usual care in the control arm. The study  
339 was conducted in two public hospitals and 13 community hospitals in Texas, North America.

340 Women with stage 3 and 4 breast cancer were more likely to receive chemotherapy in the nurse  
341 case management group compared to the control group (72.7% versus 30%, p-value 0.056)[10]. In  
342 other words, this is 61% of the woman not receiving chemotherapy in the absence of care  
343 coordinators actually receiving chemotherapy with nurse case management [1- (27.3/70)]. Overall  
344 for women of all stages of breast cancer those in the intervention arm were less likely to receive  
345 inappropriate treatment than the control arm (16.9% versus 26.2%, p-value 0.061) [10].

346 As study participants were over the age of 65 and predominantly of low income status we would  
347 expect to see less of an improvement in chemotherapy coverage with the nurse case management  
348 intervention at a general population level. The case management intervention was also more  
349 intensive than the CCC intervention we are modelling as it included home visits and monthly  
350 telephone calls to patients.

351 Taking into account the chemotherapy referral process in New Zealand (including centres with and  
352 without multi-disciplinary team meetings) and discussions with local health care professionals  
353 (medical oncologist, colorectal surgeon, colorectal nurses and oncology nurses from different district  
354 health boards in New Zealand) our best estimate is an increase in 10-70% of those eligible to receive  
355 adjuvant chemotherapy receiving it with the CCC programme than would not otherwise. We  
356 estimate the effect size to be between 10-50% for most patients and only up to 70% in a minority of

357 patients. This as shown in Figure 7 using a beta distribution with alpha=3 and beta=6, giving a mean  
358 of 0.33, standard deviation of 0.15 (95% UI 0.09 to 0.65).

359 We assumed that this parameterisation was the same across all socio-demographic strata, as the  
360 role of the CCC here is to ensure patients are discussed at the multi-disciplinary team meeting  
361 (where these exist) post operatively and that referrals are appropriately completed (in order to  
362 minimise delays) and reach the oncology department in a timely manner.

363 **Figure 7: Beta distribution (assigned by authors following review of evidence and**  
364 **discussion with experts) for effect size of improved coverage of chemotherapy among**  
365 **eligible non-refusers.**

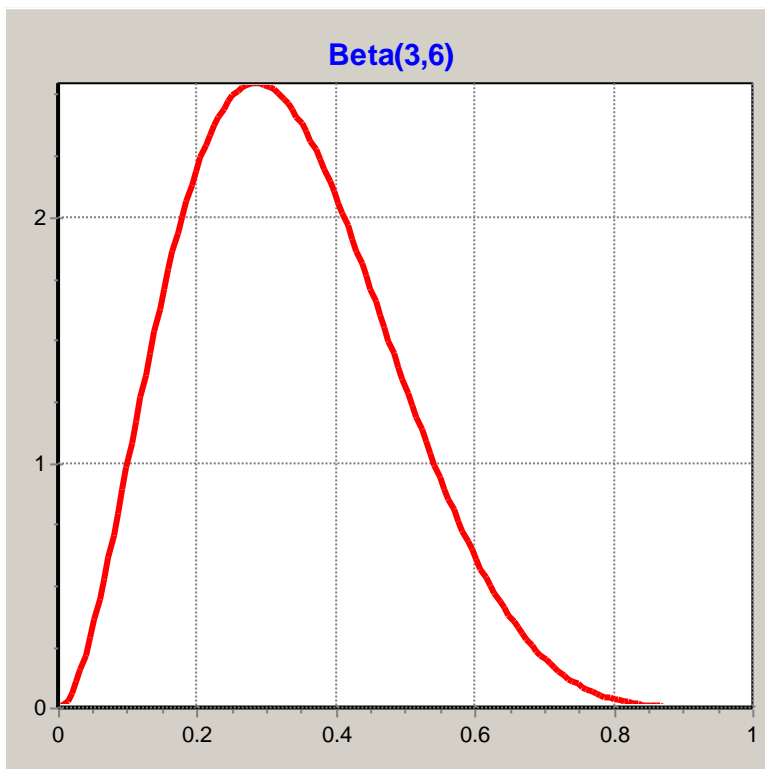

366  
367 Returning to our example above of 80-84 year old male Māori, this (best estimate; will actually be  
368 parameter with uncertainty as above) 33% increase in the uptake of chemotherapy applies to the  
369 56.3% who did not receive chemotherapy in the baseline, but we estimate were actually eligible.  
370 Thus, our best estimate is that  $33\% \times 56.3\% = 18.8\%$  of all 80-84 year old male Māori are shifted  
371 from surgery only, to surgery and chemotherapy (i.e.  $P[k=2|i=Māori/male/80-84] = 0.188$ ). Or

372 conditional on already being in the  $j=1$  strata only receiving surgery,  $P[k=2 | i=\text{Māori/male/80-84}, j=1]$   
373  $= 0.188 / 0.813 = 0.231$ .

#### 374 **Excess mortality rates under intervention: increasing coverage of chemotherapy**

375 Part of the CCC effect is by increasing coverage of chemotherapy, which lowers the EMR (or  
376 increases survival). However, the gain from receiving chemotherapy will probably not be as large as  
377 the observed difference in EMRs between  $j=1$  and  $j=2$ , as this also includes some difference in EMR  
378 due to background characteristics that influenced treatment decisions in the absence of the  
379 intervention. (That is, the observed difference in EMR between those people receiving surgery only  
380 and people receiving both surgery and chemotherapy will be due to *both* the ‘true’ treatment effect  
381 of chemotherapy and confounding whereby people with (say) higher comorbidities were both less  
382 likely to receive chemotherapy and had worse cancer survival.) Therefore, we could not use existing  
383 data to estimate  $EMR[III]_{i,j=1,k=2}^t$ . Rather, we used the best estimate from the literature of the  
384 hazard ratio reduction in mortality for chemotherapy treatment among stage III colon cancer  
385 patients (assumed constant across socio-demographic strata and time following receipt of  
386 chemotherapy), and multiplied this by  $EMR[III]_{i,j=1}^t$  to generate  $EMR[III]_{i,j=1,k=2}^t$ . The best  
387 estimate from the literature (to our knowledge) is given by Sargent et al[11]. Pooling 18 randomised  
388 trials, they estimate a hazard ratio of *overall survival* of 0.74 (no confidence interval given in the  
389 paper, but estimated as 0.64 to 0.86).

390 However this study only analysed trials testing fluorouracil-based adjuvant therapy (predominantly  
391 fluorouracil plus leucovorin) without the addition of oxaliplatin as present in the FOLFOX regimen  
392 currently used in New Zealand (and costed in this analysis). We thus incorporated the additional gain  
393 in overall survival by using oxaliplatin in the FOLFOX4 regimen[12] in overall sensitivity analysis. The  
394 MOSAIC trial gave a hazard ratio for recurrence (at the median follow-up of 37.9 months) in the  
395 group given fluorouracil plus leucovorin (FL) plus oxaliplatin, as compared to the FL group, as 0.77  
396 (95%CI 0.65 to 0.91;  $p=0.002$ ) corresponding to a 23% reduction in the risk of relapse [13]. Patients

397 in the MOSAIC trial followed beyond the 3 year cut-off showed the probability of surviving at 6 years  
398 with FOLFOX versus LV as 68.3% versus 72.9% with a hazard ratio of 0.80 (0.66, 0.98) [12].

399 We model excess and other mortality rates (and consequent transition probabilities) separately –  
400 the EMRR for receipt of chemotherapy will therefore be less again. For example, by the end of the  
401 first year of follow-up the EMR for colon cancer is about 0.10 per person per year for a 60-64 year  
402 old. Averaging across sexes and ethnic groups, the background annual mortality rate at this age is  
403 about 0.01 – a total mortality rate of 0.11. Assume about two thirds of colon cancer patients were  
404 receiving chemotherapy, and disregard variations in background mortality for now by receipt of  
405 chemotherapy. Let 'X' be the EMR of those not receiving chemotherapy. Therefore,  $0.11 = 0.33$   
406  $(X+0.01) + 0.67 \times 0.74 (X+0.01)$ , meaning  $X = 0.123$ . For an overall survival hazard ratio of 0.74 (i.e. the  
407 Sargent et al estimate, excluding oxaliplatin), then  $0.74 = (0.01 + \text{EMRR} \times 0.123) / (0.01 + 0.123)$ ,  
408 meaning the EMRR is  $0.719 \approx 0.72$ . Thus, we estimate the EMRR for receipt of chemotherapy  
409 (excluding oxaliplatin) as 0.72 with a shifted 95% confidence interval of 0.61 to 0.85 using the same  
410 formulas. Likewise, we estimated the additional EMRR for oxaliplatin as  $0.784 \approx 0.78$ , with a shifted  
411 confidence interval of 0.63 to 0.98.

#### 412 **Proportionate reduction in average days to surgery; $\Delta[\text{Dx} \rightarrow \text{Surg}_i]$**

413 In order to find the effect size of a CCC intervention in improving timeliness of care from provisional  
414 diagnosis to surgery and from surgery to chemotherapy for cancer patients a systematic literature  
415 search was conducted in Ovid MEDLINE (R), the Database of Abstracts of Reviews of Effects, the HTA  
416 database, the Cochrane Library, the New Zealand Ministry of Health publications and NHS EED. The  
417 search strategy and findings are documented in Additional File 3. Of the 511 records retrieved from  
418 the six databases, 476 were excluded after relevance screening and a further 43 were excluded for  
419 not meeting our remaining inclusion criteria.

420 Fourteen studies were found via 'snowballing' and 'information foraging' that measured the impact  
421 of nurse-led interventions on improving timeliness of care; two from systematic reviews produced

422 by our systematic search and the remaining from 'information foraging'. Ten of these 14 were  
423 excluded for not meeting our inclusion criteria. Of the remaining four, three were identified as  
424 having poor internal validity[31-33], leaving only one study to inform our effect size estimate[14].

425 The remaining study was a retrospective case series analysis using historical controls showing a 21%  
426 reduction in the median days from initial presentation to first treatment [14]. The intervention  
427 evaluated was similar to our specified intervention including the typical supportive and coordination  
428 roles, however study participants were also provided with cell phones, taxi passes and child care  
429 services.

430 The study participants were a targeted population not generalisable to the general population as  
431 they were identified by health care providers as being most in need of patient navigation and thus  
432 more likely to have more complex clinical pictures or experiencing barriers of access to care. In this  
433 regard the improvement in timeliness of care for this population is likely an underestimate for the  
434 general population.

435 Based on this study, an understanding of the functioning of the New Zealand healthcare system, and  
436 discussions with health professionals from different district health boards (medical oncologist,  
437 colorectal surgeon, oncology nurses) we estimate that the proportionate reduction in average days  
438 from diagnosis to surgery is 20%. We parameterised this conservative best estimate as a beta  
439 distribution (Figure 8) with  $\alpha=2$  and  $\beta=8$ , giving a mean of 0.2 and SD of 0.121 (95% UI 0.03 to  
440 0.48). We have deliberately specified this with considerable uncertainty due to the lack of robust  
441 published evidence to support our estimate. We assumed this parameter to be the same across  
442 socio-demographic strata.

443 **Figure 8: Beta distribution assigned by authors to effect size of: decreasing time from**  
444 **provisional diagnosis to surgery; decreasing time from surgery to chemotherapy**

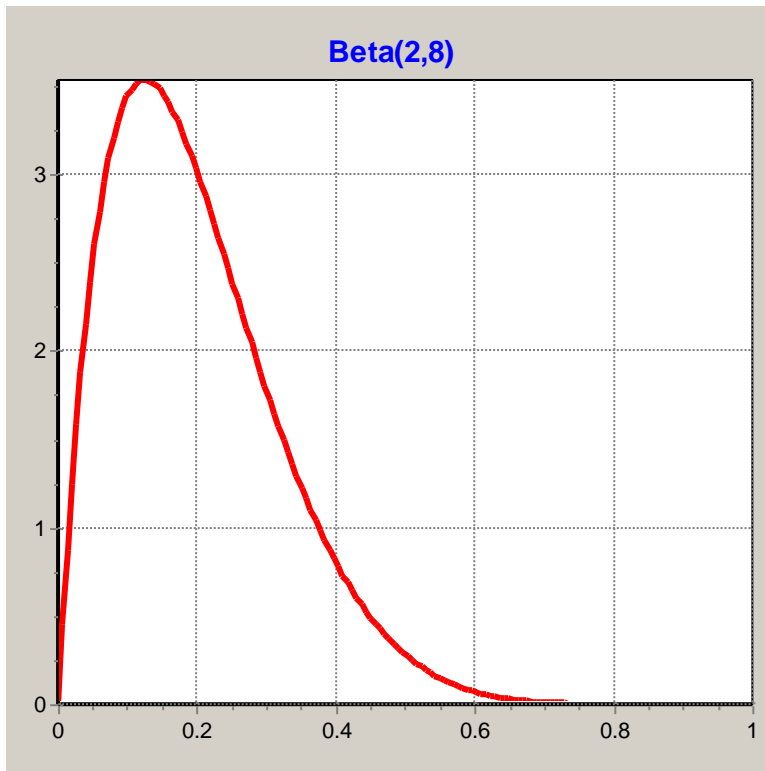

445

446 **Proportionate reduction in average days to chemotherapy;  $\Delta$ [Surg→Chemo,]**

447 A systematic literature search was conducted in Ovid MEDLINE (R), the Database of Abstracts of  
448 Reviews of Effects, the HTA database, the Cochrane Library, the New Zealand Ministry of Health  
449 publications and NHS EED to find CCC interventions that improve timeliness of care across the care  
450 pathway. The search strategy is documented in Additional File 3. From this search no studies were  
451 found to measure the effect of a CCC type intervention on the time from surgery to chemotherapy.

452 One study was found via 'snowballing' to measure the effect of a CCC intervention on the timeliness  
453 of care from surgery to adjuvant therapy in cancer patients. This study was the same retrospective  
454 case series analysis discussed earlier under the parameter 'proportionate reduction in average days  
455 to surgery'[14]. The patient navigator intervention in this study showed no reduction in time from  
456 surgery to adjuvant therapy for breast cancer patients.

457 After discussion with local clinical experts we do not estimate a null effect of CCCs on reducing the  
458 time from surgery to adjuvant chemotherapy for colon cancer patients in the New Zealand context.  
459 Discussions with key informants working within the surgical and oncology public healthcare services  
460 of New Zealand suggests CCCs could play a major role in improving the efficiency of the referral  
461 process between the surgical and oncology teams postoperatively. This would be achieved by the  
462 CCC ensuring no patients are missed out at the surgical multi-disciplinary team meeting discussions,  
463 ensuring timely discussions for all patients at these meeting (as soon after their lymph node biopsy  
464 results as possible) as well as timely and appropriately completing referrals to oncology and acting  
465 on any delays to referrals being received. In hospitals where no multi-disciplinary team meetings  
466 exist or other organised triaging and referral system, CCCs are likely to have more of an impact on  
467 improving timely initiation of adjuvant chemotherapy post-operatively. The CCC role will be unable  
468 to improve current waiting lists for chemotherapy.

469 With the current time period from surgery to initiating chemotherapy in New Zealand being on  
470 average 4-8 weeks [21, 34] we estimate that the proportionate reduction in average days from  
471 surgery to start of chemotherapy with the CCC intervention to be 20%. We parameterised our best  
472 estimate as the same beta distribution as for time to surgery **Error! Reference source not**  
473 **found.**with  $\alpha=2$  and  $\beta=8$ , giving a mean of 0.2 and SD of 0.121 (95% UI 0.03 to 0.48). As  
474 above, we have deliberately specified this with considerable uncertainty due to the lack of strong  
475 evidence available. We assumed this parameter to be the same across socio-demographic strata.

#### 476 **Reduction in cancer excess mortality per day decrease in time to surgery; EMRR [Dx→Surgery/day]**

477 A structured literature search was carried out in Ovid MEDLINE (R) 1946 to April 2012 and Google  
478 Scholar to identify studies that investigated whether a change in the time from diagnosis to surgery  
479 impacted on survival. The following Medical Subject Headings were used: 'neoplasms', 'colon',  
480 'colorectal neoplasms', 'general surgery', 'time factors', 'survival', 'survival analysis' and 'mortality'.



481 Other keyword search terms used were: 'cancer', 'colorectal', 'treatment', 'surgery', 'timeliness',  
482 'timeframe', 'delay' and 'clinical outcomes'.

483 It is well established that diagnosing cancer earlier improves survival; however this is dependent on  
484 diagnosing the cancer at an earlier stage. Results from observational studies looking at the  
485 relationship between earlier treatment and survival in cancer are often counter-intuitive showing  
486 either no improvement or a negative association. As Neal describes this is likely to be due to studies  
487 failing to account for the speed of growth of tumours; more aggressive tumours present more  
488 quickly, are treated more quickly however endure worse outcomes[35]. Stapley confirms this notion  
489 by observing that in studies which adjust for emergency admissions as a confounding factor the  
490 negative associations seen between decreasing time to treatment and impact on survival in  
491 colorectal cancer cease to exist.[36]

492 In the absence of valid direct evidence of how survival improves with earlier surgery, we instead  
493 used the differences in EMRs between stages and the average number of days in a natural history  
494 model in each stage to calculate the relative increase in EMR with each extra day until diagnosed.  
495 Next, we assumed this relative increase in EMR with each subsequent day's delay in diagnosis was  
496 the same as the relative increase in EMR for each subsequent day's delay to imitating definitive  
497 treatment, namely surgery. This is described in more detail below.

- 498 1. As published elsewhere, the EMRRs in New Zealand comparing SEER extent of disease  
499 regional to local colon cancer is 4.26, and distant compared to local is 26.8[3].
- 500 2. Whyte et al (2011)[15] have published 95% confidence limits for annual transition  
501 probabilities from Duke stage A to B (0.73 to 0.93; assuming a logit normal distribution this  
502 gives 0.90 as the central estimate), from Dukes B to C (0.72 to 0.94; 0.86), and from Dukes C  
503 to D (0.61 to 0.92; 0.81). Tappenden et al (2007) in forerunner work to the Whyte et al paper  
504 also give the annual transition probability from Dukes D to death from cancer of 0.39[16].

505 For the central estimates, these correspond to rates per person year of 2.34, 1.99, 1.66 and  
506 0.49, respectively.

507 3. The average duration in each stage, assuming an exponential distribution of times, is 1/exit  
508 rate, or 0.43, 0.50, 0.60 and 2.05 years in each of Dukes stage A, B, C and D, respectively.

509 4. Dukes A is roughly equivalent to SEER extent of disease 'local', B and C to Regional, and D to  
510 distant. Therefore average times in local, regional and distant SEER stages (in a natural  
511 disease history model) might be 0.43, 1.10 and 2.05 years, respectively.

512 5. Using these average times, one can plot them against the  $\ln(\text{EMRR})$  by stage, and calculate  
513 the slope of the regression line joining the three points. For the central estimates, this slope  
514 is a 0.0028 unit increase in  $\ln(\text{EMRR})$  per day of the natural history progression through the  
515 stages. Using the lower confidence limits of the days in each stage this slope estimate was  
516 0.0011, and using the upper confidence limits 0.0041. These regression estimates using the  
517 lower and upper confidence limits on the one hand are probably overestimates (by assuming  
518 1.0 correlation in uncertainty in the average days in each stage), and on the other hand  
519 underestimates due to not including uncertainty in the EMRRs themselves. Thus, and given  
520 the (necessary) assumptions in this method, we simply scale up this uncertainty interval by  
521 50%, giving our final estimates of 0.0028 (95% UI 0.0011 to 0.0045) for the  $\ln(\text{EMRR})$  per day  
522 of delayed diagnosis. Exponentiated, this is a 1.0028 ratio increase in the EMR per day delay  
523 in diagnosis. We extrapolate this to also apply to delays in days to surgery and conversely it's  
524 inverse to days quicker to surgery (ending up with EMRR per day quicker to surgery of  
525 0.9972, with 95% UI 0.9955 to 0.9987).

526 Are these estimates plausible? Given the relatively rapid growth and transit times between stages,  
527 and the very large increases in EMR with stage, yes. However, it must be emphasised that these are  
528 not empirical estimates, and assume an exponential distribution of the rate between stages. This  
529 may be adequate for calculations about the average duration times. However, it is much more likely  
530 that the actual distribution of rates over time is Gamma, but we have insufficient data from the two

531 source papers to parameterise that. (However, for a range of possible Gamma distributions that  
532 generated a cumulative probability after one year of a similar magnitude to those reported by  
533 Whyte et al, we found that the average number of days in each stage was usually within +/-10% to  
534 20% of that from an exponential distribution assumption.)

#### 535 **Reduction in cancer excess mortality per day decrease in time to chemo; EMRR [Dx→ Chemo/day]**

536 A structured literature search was carried out in Ovid MEDLINE (R) 1946 to April 2012 and Google  
537 Scholar to investigate the relationship between reducing the time to initiating chemotherapy  
538 following surgery in stage III colon cancer and survival. The following Medical Subject Headings were  
539 used: 'neoplasms', 'colon', 'colorectal neoplasms', 'therapeutics', 'time factors', 'survival', 'survival  
540 analysis' and 'mortality'. Other keyword search terms used were: 'cancer', 'colorectal', 'treatment',  
541 'therapy', 'timeliness', 'timeframe', 'delay', 'interruption' and 'clinical outcomes'.

542 The highest quality evidence found measuring the impact of timeliness of chemotherapy on survival  
543 is a meta-analysis of ten studies showing statistically significant decreases in overall survival and  
544 disease-free survival associated with an increase in time between surgery and chemotherapy  
545 initiation in colon cancer patients stage II and III[17]. A decrease in overall survival (HR 1.14 95% CI  
546 1.10-1.17) and disease-free survival (HR 1.14 95% CI 1.10-1.18) were associated with an increase in  
547 four weeks between surgery and initiation of adjuvant chemotherapy. The unclear inclusion criteria  
548 and assessment of studies to be included in the meta-analysis and the potential for bias in their  
549 search strategy warrants the outcomes of this study to be treated with caution, however the  
550 evidence provided is the best available to use for this input parameter in our model.

551 This study has also been criticised for being biased by confounding factors such as age and  
552 comorbidities and that poorer survival associated with starting chemotherapy later could be due to  
553 those with comorbidities recovering more slowly from surgery[37], however studies were only  
554 included in the meta-analysis that adjusted for prognostic factors. The authors defend their findings  
555 by demonstrating that the overall and cancer specific survival reveal a similar effect size.

556 Based on this increase in overall mortality of 14% for every four week delay in initiation of adjuvant  
557 chemotherapy we estimate the excess mortality rate ratio (EMRR) per day less from diagnosis to  
558 initiating chemotherapy to be 0.9953 (i.e.  $(1/1.14)^{(1/28)}$ ) with a 95% UI 0.9938 to 0.9969. On the log  
559 normal scale, the estimates are -0.0047, -0.0062 to -0.0031. We assumed this parameter to be the  
560 same across socio-demographic strata.

#### 561 **Proportionate reduction in disability weight**

562 A systematic literature search was conducted in Ovid MEDLINE (R), the Database of Abstracts of  
563 Reviews of Effects, the HTA database, the Cochrane Library, the New Zealand Ministry of Health  
564 publications and NHS EED to identify studies that measured the impact of CCC type interventions on  
565 quality of life. The search strategy and findings are documented in Additional File 3. Of the 381  
566 systematic reviews retrieved from databases, 361 were excluded after relevance screening and a  
567 further 20 were excluded for not meeting our remaining inclusion criteria (predominantly as they  
568 measured patient satisfaction rather than a recognised quality of life indicator and thus had  
569 unsuitable outcomes to address our research question). This left no relevant papers from our  
570 systematic search of systematic reviews that met our inclusion criteria.

571 22 papers were retrieved from 'snowballing' and 'information foraging' and of these three were  
572 excluded on relevance and a further 15 were excluded for not meeting our inclusion criteria,  
573 predominantly for the intervention not being similar enough to the one we are modelling,  
574 particularly the point in the patient care pathway. Of the four remaining papers that did meet our  
575 inclusion criteria; one study showed a significant improvement in quality of life with a CCC type  
576 intervention, the other three showed improvements in quality of life measures but none statistically  
577 significant. All the studies used internationally recognised quality of life measurement tools however  
578 only one of these was compatible to converting the change in quality of life to a change in disability  
579 weight using the EQ-5D[18]. This study also happened to be evaluating an intervention most similar  
580 to that being modelled here.

581 The Ferrante et al study (which was identified, from hand searching the reference list of one of the  
582 systematic reviews excluded) measured changes in anxiety on the Zung Anxiety Self-Assessment  
583 Scale at the time of an abnormal mammogram and one month after final resolution of diagnosis[18].  
584 The mean anxiety index in the control arm of breast cancer patients started within normal range  
585 (mean 36.5, SD 6.9) and then increased to the mild anxiety range (mean 50.3, SD 15.6) in the follow-  
586 up stage. For the breast cancer patients who had patient navigation their baseline anxiety score was  
587 higher initially in the mild anxiety range (mean 41.9, SD 14.7) which reduced to within the normal  
588 anxiety range in the follow-up phase (mean 32.9, SD 12.2). Thus the apparent effect of care  
589 coordinators was  $50.3 - 32.9 = 17.4$  for a cross-sectional post-randomisation comparison, or  $([41.9-$   
590  $32.9] - [36.5-50.3]) = 22.8$  for a difference in pre-post changes in control and interventions arms. The  
591 average effect size is therefore about 20 points.

592 Previous work has shown composite scores of the EQ-5D anxiety domain were significantly  
593 correlated with the composite scores of the Zung anxiety scale ( $r=0.590$ ;  $p<0.001$ ).[38] Similarly the  
594 scores on the EQ-5D visual analogue scale were significantly correlated with the composite scores of  
595 the Zung' anxiety scale ( $r=0.564$ ;  $p<0.001$ ). Therefore, we next assume that a one category shift on  
596 the Zung Anxiety scale is equivalent to a one point shift in the anxiety domain of the EuroQol (EQ-  
597 5D) scale i.e. EQ-5D index score 11111 (perfect health) to 11112 (moderate anxiety but otherwise  
598 perfect health) or from 11112 to 11113 (severe anxiety but otherwise perfect health).

599 We assume the Zung categories 'normal' and 'mild' anxiety equate to the EQ-5D anxiety categories  
600 'normal' and 'moderate' and that the Zung categories 'severe' and 'extreme' anxiety equate to the  
601 EQ-5D category of 'severe' anxiety.

602 The utility score of colon cancer stage III treated with resection and chemotherapy without  
603 significant side effects has been found to be 0.7 (0.63 to 0.77) [39].

604 Valuations of EQ-5D health states for the New Zealand population have previously been constructed  
605 for 245 EQ-5D states[40]. The adequacy of EQ-5D for Māori and non-Māori New Zealanders has  
606 been investigated showing that the EQ-5D takes into account how Māori perceive health as much as  
607 non-Māori[41]. Using the publicly available EQ-5D index calculator online for New Zealand showed  
608 that a change in anxiety state from one category to another with all other EQ-5D domains remaining  
609 unchanged equates to about a 0.1 change in utility index score. Therefore, we equate the effect of  
610 CCC to a 0.1 shift in EQ-5D score.

611 Following Higashi and Barendregt [42], we set the 'effect' of CCC on quality of life as:

$$Effect^{Care\ Coord} = \frac{1 - colon\ utility + 0.1}{1 - colon\ utility} = \frac{1 - (0.7 + 0.1)}{1 - 0.7} = 0.67$$

612 We have no empirical data upon which to directly calculate an uncertainty interval about this effect.  
613 We assume that a zero effect (i.e. RR 1.0) is possible, but unlikely, and actually sets the 97.5<sup>th</sup>  
614 percentile. Therefore, the s.d. on the ln[RR] scale is  $(\ln[1]-\ln 0.67])/1.96 = 0.20$ , giving a 95%  
615 uncertainty interval of 0.45 to 1.0. We allow a wide uncertainty interval to take into consideration  
616 the three other studies which found non-significant improvements in quality of life.

1. Sarfati D, Blakely T, Pearce N: **Measuring cancer survival in populations: relative survival vs cancer-specific survival.** *Int J Epidemiol* 2010:dyp392.
2. Koerkamp BG, Stijnen T, Weinstein MC, Hunink MGM: **The Combined Analysis of Uncertainty and Patient Heterogeneity in Medical Decision Models.** *Medical Decision Making* 2011, **31**(4):650-661.
3. Blakely T, Costilla R, Soeberg M: **Cancer Excess Mortality Rates Over 2006-2026 for ABC-CBA.** In: *Burden of Disease Epidemiology, Equity, and Cost-Effectiveness Programme (BODE<sup>3</sup>) Technical Report: Number 4* Wellington: Department of Public Health, University of Otago; 2012.
4. Kvizhinadze G, Blakely T: **Projected NZ Life Tables** In: *Burden of Disease Epidemiology, Equity and Cost-Effectiveness Programme (BODE3)*. Wellington: University of Otago Wellington 2011.
5. **Differential Colon Cancer Survival by Ethnicity in New Zealand** [<http://www.otago.ac.nz/wellington/research/cancercontrol/projects/otago019908.html>]
6. Des Guetz G, Uzzan B, Morere J-F, Perret G, Nicolas P: **Duration of adjuvant chemotherapy for patients with non-metastatic colorectal cancer.** *Cochrane database of systematic reviews* (1):CD007046.
7. Salomon JA, Vos T, Hogan DR, Gagnon M, Naghavi M, Mokdad A, Begum N, Shah R, Karyana M, Kosen S, Farje M, Moncada G, Dutta A, Sazawal S, Dyer A, Seiler J, Aboyans V, Baker L, Baxter A, Benjamin E, Bhalla K, Bin Abdulhak A, Blyth F, Bourne R, Braithwaite T, Brooks P, Brugha T, Bryan-Hancock C, Buchbinder R, Burney P, Calabria B, Chen H, al E: **Common values in assessing health outcomes from disease and injury: disability weights measurement study for the Global Burden of Disease Study 2010.** *Lancet* 2012, **380**(9859):2129-2143.
8. Begg S, Vos T, Barker B, Stevenson C, Stanley L, Lopez A: **The burden of disease and injury in Australia 2003.** In. Canberra: AIHW; 2007.
9. Blakely T, Foster R, Wilson N: **Burden of Disease Epidemiology, Equity and Cost-Effectiveness (BODE3) Study Protocol** In: *Burden of Disease Epidemiology, Equity and Cost-Effectiveness Programme*. Wellington: University of Otago Wellington 2012.
10. Goodwin JS, Satish S, Anderson ET, Nattinger AB, Freeman JL: **Effect of nurse case management on the treatment of older women with breast cancer.** *J Am Geriatr Soc* 2003, **51**(9):1252-1259.
11. Sargent D, Sobrero A, Grothey A, O'Connell MJ, Buyse M, Andre T, Zheng Y, Green E, Labianca R, O'Callaghan C, Seitz JF, Francini G, Haller D, Yothers G, Goldberg R, de Gramont A: **Evidence for cure by adjuvant therapy in colon cancer: observations based on individual patient data from 20,898 patients on 18 randomized trials.** *Journal of clinical oncology : official journal of the American Society of Clinical Oncology* 2009, **27**(6):872-877.
12. de Gramont A, Boni C, Navarro M, Tabernero J, Hickish T, Topham C, Bonetti A, Clingan P, Lorenzato C, André T: **Oxaliplatin/5FU/LV in adjuvant colon cancer: Updated efficacy results of the MOSAIC trial, including survival, with a median follow-up of six years.** *Journal of Clinical Oncology* 2007, **25**(18S).
13. Andre T, Boni C, Mounedji-Boudiaf L, Navarro M, Tabernero J, Hickish T, Topham C, Zaninelli M, Clingan P, Bridgewater J, Tabah-Fisch I, de Gramont A: **Oxaliplatin, fluorouracil, and leucovorin as adjuvant treatment for colon cancer.** *N Engl J Med* 2004, **350**(23):2343-2351.
14. Haideri N, Moormeier J: **Impact of Patient Navigation from Diagnosis to Treatment in an Urban Safety Net Breast Cancer Population.** *Journal of Cancer* 2011, **2**(467-473).

15. Whyte S, Walsh C, Chilcott J: **Bayesian Calibration of a Natural History Model with Application to a Population Model for Colorectal Cancer.** *Medical decision making : an international journal of the Society for Medical Decision Making* 2011, **31**:625-641.
16. Tappenden P, Chilcott J, Eggington S, Patnick J, Sakai H, Karnon J: **Option appraisal of population-based colorectal cancer screening programmes in England.** *Gut* 2007, **56**(5):677-684.
17. Biagi JJ, Raphael MJ, Mackillop WJ, Kong W, King WD, Booth CM: **Association between time to initiation of adjuvant chemotherapy and survival in colorectal cancer: a systematic review and meta-analysis.** *Jama* 2011, **305**(22):2335-2342.
18. Ferrante JM, Chen PH, Kim S: **The effect of patient navigation on time to diagnosis, anxiety, and satisfaction in urban minority women with abnormal mammograms: a randomized controlled trial.** *J Urban Health* 2008, **85**(1):114-124.
19. Cancer Institute NSW: **Evaluation of the role of Cancer Care Coordinator.** Sydney: Cancer Institute NSW. In. New South Wales Cancer Institute NSW; 2011.
20. Costilla R, Atkinson J, Blakely T: **Incorporating Ethnic and Deprivation Variation to Cancer Incidence Estimates over 2006-2026 for ABC-CBA.** In. Wellington: Department of Public Health, University of Otago; 2011.
21. Hill S, Sarfati D, Blakely T, Robson B, Purdie G, Dennett E, Cormack D, Dew K, Ayanian JZ, Kawachi I: **Ethnicity and management of colon cancer in New Zealand: do indigenous patients get a worse deal?** *Cancer* 2010, **116**(13):3205-3214.
22. Sarfati D, Blakely T, Pearce N: **Measuring cancer survival in populations: relative survival vs cancer-specific survival.** *International Journal of Epidemiology* 2010(dyp392).
23. New Zealand Guidelines Group: **Management of early colorectal cancer. Evidence-based Best Practice Guideline.** In. Wellington Ministry of Health; 2011.
24. Ducreux M, Bennouna J, Hebbar M, al e: **Capecitabine plus oxaliplatin (XELOX) versus 5-fluorouracil/leucovorin plus oxaliplatin (FOLFOX-6) as first-line treatment for metastatic colorectal cancer.** *International Journal of Cancer* 2011, **128**(3):682-690.
25. Medsafe: **Xeloda.** In. Edited by Medsafe: Medsafe; 2011.
26. Medsafe.: **DBL Leucovorin Calcium Injection USP ad Tablets** In. Edited by Medsafe: Medsafe 2007.
27. Medsafe.: **DBL Oxaliplatin for Injection.** In. Edited by Medsafe: Medsafe; 2008.
28. Medsafe.: **Fluorouracil: Fluorouracil Injection BP 25 mg/ml.** In. Edited by Medsafe: Medsafe; 2011.
29. Cunningham R, Sarfati D, Hill S, al e: **Colon cancer management in New Zealand: 1996-2003.** *New Zealand Medical Journal* 2009, **122**(1294):51-60.
30. Wulff CN, Thygesen M, Sondergaard J, al e: **Case management used to optimize cancer care pathways: a systematic review.** *BMC Health Services Research* 2008, **8**(227).
31. Donelan K, Mailhot JR, Dutwin D, Barnicle K, Oo SA, Hobrecker K, Percac-Lima S, Chabner BA: **Patient perspectives of clinical care and patient navigation in follow-up of abnormal mammography.** *J Gen Intern Med* 2011, **26**(2):116-122.
32. Koh C, Nelson JM, Cook PF: **Evaluation of a patient navigation program.** *Clinical Journal of Oncology Nursing* 2011, **15**(1):41-48.
33. Schwaderer KA, Proctor JW, Martz EF, Slack RJ, Ricci E: **Evaluation of Patient Navigation in a Community Radiation Oncology Center Involved in Disparities Studies: A Time-to-Completion-of-Treatment Study.** *Journal of Oncology Practice* 2008, **4**(5):220-224.
34. Hill S, Sarfati D, Blakely T, Robson B, Purdie G, Chen J, Dennett E, Cormack D, Cunningham R, Dew K, McCreanor T, Kawachi I: **Survival disparities in Indigenous and non-Indigenous New Zealanders with colon cancer: the role of patient comorbidity, treatment and health service factors.** *Journal of epidemiology and community health* 2010, **64**(2):117-123.
35. Neal RD: **Do diagnostic delays in cancer matter?** *British journal of cancer* 2009, **101**:S9-S12.



36. Stapley S, Peters TJ, Sharp D, Hamilton W: **The mortality of colorectal cancer in relation to the initial symptom at presentation to primary care and to the duration of symptoms: a cohort study using medical records.** *British journal of cancer* 2006, **95**(10):1321-1325.
37. Sargent D, Grothey A, Gray R: **Time to initiation of adjuvant chemotherapy and survival in colorectal cancer.** *Jama* 2011, **306**(11):1199; author reply 1200.
38. Klemenc-Ketis Z, Kersnik J, Eder K, al e: **Factors associated with health-related quality of life among university students.** *Srpski arhiv za celokupno lekarstvo* 2011, **139**(3-4):197-202.
39. Ness RM, Holmes AM, Klein R, Dittus R: **Utility valuations for outcome states of colorectal cancer.** *Am J Gastroenterol* 1999, **94**(6):1650-1657.
40. Devlin NJ, Hansen P, Kind P, Williams AH: **The health state preferences and logical inconsistencies of New Zealanders: A tale of two tariffs.** In: *Centre for Health Economics Discussion Paper 180.* Dunedin, New Zealand The University of York, Centre for Health Economics, and University of Otago, New Zealand; 2000.
41. Perkins MR, Devlin NJ, Hansen P: **Māori health state preferences: a pilot study** In: *Economics Discussion Papers Series.* Dunedin, New Zealand: Department of Economics

University of Otago; 2001.

42. Higashi H, Barendregt JJ: **Cost-effectiveness of total hip and knee replacements for the Australian population with osteoarthritis: discrete-event simulation model.** *PLoS One* 2011, **6**(9):e25403.
