# Supplementary material for: Cancer care coordinators in stage III colon cancer: a cost-utility analysis
Source: Springer Nature journal article supplement (doi:10.1186/s12913-015-0970-5), 2015-08-04
Supplement: MOESM3 [file 9757516]

# **Additional File 3:**

## **Literature search strategies**

### **For ‘Cancer care coordinators in Stage III colon cancer: a cost-utility analysis’**

---

Tony Blakely<sup>1†</sup>, Lucie Collinson<sup>1</sup>, Giorgi Kvizhinadze<sup>1</sup>, Nisha Nair<sup>1</sup>, Rachel Foster<sup>1</sup>, Elizabeth Dennett<sup>2</sup>, Diana Sarfati<sup>1</sup>

<sup>1</sup>Burden of Disease Epidemiology, Equity, and Cost-Effectiveness (BODE<sup>3</sup>) Programme, Department of Public Health, University of Otago Wellington, PO Box 7343, Wellington, New Zealand

<sup>2</sup>Department of Surgery, University of Otago Wellington, PO Box 7343, Wellington, New Zealand

<sup>†</sup>corresponding author

1 **Additional File 3: Systematic literature search strategies for effect sizes of the**  
 2 **cancer care coordinator (CCC) intervention**

3 This file documents our systematic literature search strategies and findings for the three key input  
 4 parameters for the effect size of the intervention; timeliness of care, coverage of chemotherapy and  
 5 change in quality of life.

6 **Table 1: ‘Timeliness of care’ systematic literature search for systematic reviews**

| <b>Literature Search Summary Form</b>                                                                                                                                                               |                                                                                               |
|-----------------------------------------------------------------------------------------------------------------------------------------------------------------------------------------------------|-----------------------------------------------------------------------------------------------|
| Date: 02/08/2012                                                                                                                                                                                    |                                                                                               |
| <b>1. Research question defined</b>                                                                                                                                                                 |                                                                                               |
| <i>Do cancer care coordinators improve timeliness of care?</i>                                                                                                                                      |                                                                                               |
| P (population) = patients with cancer                                                                                                                                                               |                                                                                               |
| I (intervention/exposure and setting) = nurse-led care coordination intervention                                                                                                                    |                                                                                               |
| C (Comparisons) = baseline care with no care coordinator roles in place                                                                                                                             |                                                                                               |
| O (outcome) = improved timeliness of care                                                                                                                                                           |                                                                                               |
| T (timeframe) = from diagnosis of cancer to receiving treatment                                                                                                                                     |                                                                                               |
| <b>2. Defined Inclusion and Exclusion Criteria</b>                                                                                                                                                  |                                                                                               |
| <u>Inclusion</u>                                                                                                                                                                                    | <u>Exclusion</u>                                                                              |
| Nurse-led patient-level coordination intervention                                                                                                                                                   | Systems-level coordination intervention                                                       |
| Hospital based intervention                                                                                                                                                                         | Community based intervention                                                                  |
| Intervention matches our care coordinator intervention specification i.e. face to face contact with patient                                                                                         | Solely telephone-based interventions or other non-face to face patient contact interventions. |
| <b>Systematic reviews</b>                                                                                                                                                                           |                                                                                               |
| All systematic reviews relevant to the research question published from 1946 onwards                                                                                                                | Opinion pieces, non-systematic reviews                                                        |
| All other specific inclusion and exclusion criteria as defined above                                                                                                                                |                                                                                               |
| <b>3. Explicit search strategy</b>                                                                                                                                                                  |                                                                                               |
| <u>Keywords</u>                                                                                                                                                                                     | <u>Medical Subject Headings (MeSH terms)</u>                                                  |
| coordinat* OR care coordinator* OR patient navigatio* OR nurse case manag* OR clinical nurse specialist OR nurse specialist OR nurse practitioner* OR case manage* OR key worker OR liaison officer | case management OR nurse clinicians OR nurse practitioners                                    |
| Cancer                                                                                                                                                                                              | Neoplasms                                                                                     |
| Treatment OR therapy OR surgery OR chemotherapy                                                                                                                                                     | therapeutics OR general surgery OR drug therapy                                               |

|                                                                                                                                                                                                                                                                                                                                                                                                                                                                                                                                               |                                 |
|-----------------------------------------------------------------------------------------------------------------------------------------------------------------------------------------------------------------------------------------------------------------------------------------------------------------------------------------------------------------------------------------------------------------------------------------------------------------------------------------------------------------------------------------------|---------------------------------|
| time OR delay                                                                                                                                                                                                                                                                                                                                                                                                                                                                                                                                 | time OR time factors            |
| <u>Limits</u>                                                                                                                                                                                                                                                                                                                                                                                                                                                                                                                                 |                                 |
| English language. Humans. Reviews (maximises specificity)                                                                                                                                                                                                                                                                                                                                                                                                                                                                                     |                                 |
| <b>4. Sources used</b>                                                                                                                                                                                                                                                                                                                                                                                                                                                                                                                        |                                 |
| Medline                                                                                                                                                                                                                                                                                                                                                                                                                                                                                                                                       | Cochrane library                |
| DARE and HTA databases                                                                                                                                                                                                                                                                                                                                                                                                                                                                                                                        | Ministry of Health Publications |
| <b>Economic papers</b>                                                                                                                                                                                                                                                                                                                                                                                                                                                                                                                        |                                 |
| NHS EED                                                                                                                                                                                                                                                                                                                                                                                                                                                                                                                                       |                                 |
| <b>5. Summary of search</b>                                                                                                                                                                                                                                                                                                                                                                                                                                                                                                                   |                                 |
| <b>Systematic reviews</b>                                                                                                                                                                                                                                                                                                                                                                                                                                                                                                                     |                                 |
| Number of records retrieved from databases                                                                                                                                                                                                                                                                                                                                                                                                                                                                                                    | 511                             |
| Number of additional records received from other sources                                                                                                                                                                                                                                                                                                                                                                                                                                                                                      | 14                              |
| Total number of records retrieved after removal of duplicates                                                                                                                                                                                                                                                                                                                                                                                                                                                                                 | 523                             |
| Number of records excluded by relevance screening                                                                                                                                                                                                                                                                                                                                                                                                                                                                                             | 476                             |
| Number of articles excluded by exclusion criteria (i.e. one or more of the following):                                                                                                                                                                                                                                                                                                                                                                                                                                                        | 43                              |
| o Unsuitable article type, e.g. non-systematic review or editorial                                                                                                                                                                                                                                                                                                                                                                                                                                                                            |                                 |
| o Unsuitable study population to address our research question                                                                                                                                                                                                                                                                                                                                                                                                                                                                                |                                 |
| o Unsuitable intervention/exposure to address our research question                                                                                                                                                                                                                                                                                                                                                                                                                                                                           |                                 |
| o Unsuitable outcome to address our research question                                                                                                                                                                                                                                                                                                                                                                                                                                                                                         |                                 |
| o Updated or repetition of other similar review by same authors                                                                                                                                                                                                                                                                                                                                                                                                                                                                               |                                 |
| o Other (specify)                                                                                                                                                                                                                                                                                                                                                                                                                                                                                                                             |                                 |
| Number of articles excluded by critical appraisal                                                                                                                                                                                                                                                                                                                                                                                                                                                                                             | 3                               |
| Reasons: All three excluded by critical appraisal are non-randomised studies. Donelan et al presented patient reported outcomes (and thus likely to be biased as reliant on memory). Koh et al used historical controls with a small sample size (n=55) of predominantly employed patients with private health insurance. Schwaderer et al did not clearly describe baseline characteristics of the participants and the results lack internal validity, it is unclear whether the differences were influenced by a patient navigator or not. |                                 |
| <i>Total number of articles retained for inclusion</i>                                                                                                                                                                                                                                                                                                                                                                                                                                                                                        | 1                               |

| Search Results Table               |                                                                                                                                                                                                                                                                                                                                                                                                                                                                                                                                                                                                                                                                                                                                                                                                                                                                                                                                                                                                                              |                       |                          |                                         |                                |        |                                                      |        |                                      |       |
|------------------------------------|------------------------------------------------------------------------------------------------------------------------------------------------------------------------------------------------------------------------------------------------------------------------------------------------------------------------------------------------------------------------------------------------------------------------------------------------------------------------------------------------------------------------------------------------------------------------------------------------------------------------------------------------------------------------------------------------------------------------------------------------------------------------------------------------------------------------------------------------------------------------------------------------------------------------------------------------------------------------------------------------------------------------------|-----------------------|--------------------------|-----------------------------------------|--------------------------------|--------|------------------------------------------------------|--------|--------------------------------------|-------|
| Database                           | Search string                                                                                                                                                                                                                                                                                                                                                                                                                                                                                                                                                                                                                                                                                                                                                                                                                                                                                                                                                                                                                | No. of papers         |                          |                                         |                                |        |                                                      |        |                                      |       |
|                                    |                                                                                                                                                                                                                                                                                                                                                                                                                                                                                                                                                                                                                                                                                                                                                                                                                                                                                                                                                                                                                              | Initial no. retrieved | Duplica <sup>a</sup> tes | Total no. exclud <sup>a</sup> uplicates | Relevance screening of records |        | Application of Inclusion/Exclusion Criteria to paper |        | Critical appraisal (final selection) |       |
|                                    |                                                                                                                                                                                                                                                                                                                                                                                                                                                                                                                                                                                                                                                                                                                                                                                                                                                                                                                                                                                                                              |                       |                          |                                         | Exclude                        | Retain | Exclude                                              | Retain | Exclude                              | Final |
| <b>Systematic reviews</b>          |                                                                                                                                                                                                                                                                                                                                                                                                                                                                                                                                                                                                                                                                                                                                                                                                                                                                                                                                                                                                                              |                       |                          |                                         |                                |        |                                                      |        |                                      |       |
| Medline 1946 to present (02/08/12) | <ol style="list-style-type: none"> <li>1. coordinat*.mp. OR care coordinator*.mp. OR patient navigatio*.mp. OR nurse case manag*.mp. OR clinical nurse specialist.mp. OR nurse practitioner.mp. OR nurse specialist.mp. OR case manage*.mp. OR key worker.mp OR liaison officer.mp. OR Case Management/cl, ec, og [Classification, Economics, Organization &amp; Administration] OR Nurse Clinicians/cl, ec, ed, og, st, sd [Classification, Economics, Education, Organization &amp; Administration, Standards, Supply &amp; Distribution OR Nurse Practitioners/cl, ec, ed, st [Classification, Economics, Education, Standards] [138176]</li> <li>2. cancer.mp. or Neoplasms/ [977742]</li> <li>3. Treatment.mp. or Therapeutics/ OR therapy.mp. <b>OR</b> *General Surgery/su [Surgery] OR chemotherapy.mp. or Drug Therapy/ [3659908]</li> <li>4. Time/ or Time Factors/ or time.mp. OR delay.mp. [2463736]</li> <li>5. 1 and 2 and 3 and 4 [452]</li> <li>6. limit 5 to (English language and humans) [382]</li> </ol> |                       |                          |                                         |                                |        |                                                      |        |                                      |       |

|                                                                                                                          |                                                                                                                                                                                                                                                                                                                                                                                                                                                                                                                                                                                                                                                                                                                                                                                                                                                                                                                                                                                                                                                                         |                                                                    |   |     |     |    |    |   |   |   |
|--------------------------------------------------------------------------------------------------------------------------|-------------------------------------------------------------------------------------------------------------------------------------------------------------------------------------------------------------------------------------------------------------------------------------------------------------------------------------------------------------------------------------------------------------------------------------------------------------------------------------------------------------------------------------------------------------------------------------------------------------------------------------------------------------------------------------------------------------------------------------------------------------------------------------------------------------------------------------------------------------------------------------------------------------------------------------------------------------------------------------------------------------------------------------------------------------------------|--------------------------------------------------------------------|---|-----|-----|----|----|---|---|---|
|                                                                                                                          | 7. limit 6 to "reviews (maximises specificity)" [5]                                                                                                                                                                                                                                                                                                                                                                                                                                                                                                                                                                                                                                                                                                                                                                                                                                                                                                                                                                                                                     | 5                                                                  | 0 | 5   | 4   | 1  | 1  | 0 | 0 | 0 |
|                                                                                                                          | 8. limit 6 to "reviews (best balance of sensitivity and specificity)" [4]                                                                                                                                                                                                                                                                                                                                                                                                                                                                                                                                                                                                                                                                                                                                                                                                                                                                                                                                                                                               | 4                                                                  | 0 | 4   | 3   | 1  | 1  | 0 | 0 | 0 |
|                                                                                                                          | 9. limit 6 to "review articles" [82]<br>10. remove duplicates from 9 [2]                                                                                                                                                                                                                                                                                                                                                                                                                                                                                                                                                                                                                                                                                                                                                                                                                                                                                                                                                                                                | 82                                                                 | 2 | 80  | 72  | 8  | 6  | 2 | 1 | 1 |
| NZ MoH<br>(05/09/12)                                                                                                     | Manual search: cancer care coordinators                                                                                                                                                                                                                                                                                                                                                                                                                                                                                                                                                                                                                                                                                                                                                                                                                                                                                                                                                                                                                                 | 286                                                                | 0 | 286 | 267 | 19 | 19 | 0 | 0 | 0 |
| Cochrane Library:<br>Cochrane Database of Systematic Reviews, DARE, HTA Database and NHS EED<br>1946 -2012<br>(05/09/12) | 1. (coordinat*) or (care coordinat*) or (patient navigation*) or (nurse case manage*) or (clinical nurse specialist) or (nurse specialist) or (nurse practitioner*) or (case manage*) or (key worker) or (liaison officer) [7122] [Title, Abstract of Keywords]<br>2. MeSH descriptor <b>Case Management</b> , this term only or MeSH descriptor <b>Nurse Clinicians</b> , this term only or MeSH descriptor <b>Nurse Practitioners</b> , this term only [969]<br>3. #1 or #2 [7198]<br>4. (cancer)[4198] [Title, Abstract of Keywords]<br>5. MeSH descriptor <b>Neoplasms</b> , this term only [4058]<br>6. #4 or #5 [47766]<br>7. (treatment) or (therapy) or (surgery) or (chemotherapy) [29956] [Title, Abstract of Keywords]<br>8. MeSH descriptor <b>Therapeutics</b> , this term only or MeSH descriptor <b>General Surgery</b> , this term only or MeSH descriptor <b>Drug Therapy</b> , this term only [738]<br>9. #7 or #8 [434231]<br>10. (time) or (delay) [4028] [Title, Abstract of Keywords]<br>11. MeSH descriptor <b>Time</b> , this term only or MeSH | 128<br>(13<br>Reviews,<br>105<br>Trials, 10<br>Methods<br>Studies) | 0 | 128 | 126 | 2  | 2  | 0 | 0 | 0 |

|                                                                                                                                                                                                                                                                                                                                                                                                                     |                                                                                                                          |            |          |            |            |           |           |          |          |          |
|---------------------------------------------------------------------------------------------------------------------------------------------------------------------------------------------------------------------------------------------------------------------------------------------------------------------------------------------------------------------------------------------------------------------|--------------------------------------------------------------------------------------------------------------------------|------------|----------|------------|------------|-----------|-----------|----------|----------|----------|
|                                                                                                                                                                                                                                                                                                                                                                                                                     | descriptor <b>Time Factors</b> , this term only [45052]<br>12. #10 or #11 [170595]<br>13. #3 and #6 and #9 and #12 [128] |            |          |            |            |           |           |          |          |          |
| Snowballing                                                                                                                                                                                                                                                                                                                                                                                                         |                                                                                                                          | 0          | 0        | 0          | 0          | 0         | 0         | 0        | 0        | 0        |
| Information Foraging<br>(google scholar and google)                                                                                                                                                                                                                                                                                                                                                                 |                                                                                                                          | 6          | 0        | 6          | 0          | 6         | 4         | 2        | 0        | 2        |
| <b>Total</b>                                                                                                                                                                                                                                                                                                                                                                                                        |                                                                                                                          | <b>511</b> | <b>2</b> | <b>509</b> | <b>472</b> | <b>37</b> | <b>33</b> | <b>4</b> | <b>1</b> | <b>3</b> |
| a Refers to duplicate detection of the <u>same</u> citation, either within the same database, or in different databases; ensure that one citation is retained, and other duplicates discarded. This does not include duplicate publishing where the same or very similar results have been published more than once in different papers, which would be excluded after application of inclusion/exclusion criteria. |                                                                                                                          |            |          |            |            |           |           |          |          |          |

8 **Table 2: 'Coverage of treatment' systematic literature search for systematic reviews**

|                                                                                                                                                                                                |                                                                                               |
|------------------------------------------------------------------------------------------------------------------------------------------------------------------------------------------------|-----------------------------------------------------------------------------------------------|
| <b>Literature Search Summary Form</b>                                                                                                                                                          |                                                                                               |
| <b>Date:</b> 12/09/2012                                                                                                                                                                        |                                                                                               |
| <b>1. Research question defined</b>                                                                                                                                                            |                                                                                               |
| <i>Do cancer care coordinators improve coverage of treatment for eligible patients?</i>                                                                                                        |                                                                                               |
| P (population) = patients with cancer                                                                                                                                                          |                                                                                               |
| I (intervention/exposure and setting) = nurse-led care coordination intervention                                                                                                               |                                                                                               |
| C (Comparisons) = baseline care with no care coordinator roles in place                                                                                                                        |                                                                                               |
| O (outcome) = improved coverage of treatment for eligible patients                                                                                                                             |                                                                                               |
| T (timeframe) = following cancer diagnosis                                                                                                                                                     |                                                                                               |
| <b>2. Defined Inclusion and Exclusion Criteria</b>                                                                                                                                             |                                                                                               |
| <u>Inclusion</u>                                                                                                                                                                               | <u>Exclusion</u>                                                                              |
| Nurse-led patient-level coordination intervention                                                                                                                                              | Systems-level coordination intervention                                                       |
| Hospital based intervention                                                                                                                                                                    | Community based intervention                                                                  |
| Intervention matches our care coordinator intervention specification i.e. face to face contact with patient                                                                                    | Solely telephone-based interventions or other non-face to face patient contact interventions. |
| <b>Systematic reviews</b>                                                                                                                                                                      |                                                                                               |
| All systematic reviews relevant to the research question published from 1946 onwards                                                                                                           | Opinion pieces, non-systematic reviews                                                        |
| All other specific inclusion and exclusion criteria as defined above                                                                                                                           |                                                                                               |
| <b>3. Explicit search strategy</b>                                                                                                                                                             |                                                                                               |
| <u>Keywords</u>                                                                                                                                                                                | <u>Medical Subject Headings (MeSH terms)</u>                                                  |
| coordinat* OR care coordinat* OR patient navigat* OR nurse case manag* OR clinical nurse specialist OR nurse specialist OR nurse practitioner OR case manage* OR key worker OR liaison officer | case management OR nurse clinicians OR nurse practitioners                                    |
| cancer                                                                                                                                                                                         | Neoplasms                                                                                     |
| Treatment OR therapy OR surgery OR chemotherapy                                                                                                                                                | therapeutics OR general surgery OR colorectal surgery OR drug therapy                         |
| Coverage OR access                                                                                                                                                                             |                                                                                               |
| <u>Limits</u>                                                                                                                                                                                  |                                                                                               |
| English language. Humans. Reviews (maximises specificity)                                                                                                                                      |                                                                                               |
| <b>4. Sources used</b>                                                                                                                                                                         |                                                                                               |
| Medline                                                                                                                                                                                        | Cochrane library                                                                              |
| DARE and HTA databases                                                                                                                                                                         | Ministry of Health Publications                                                               |
| <b>Economic papers</b>                                                                                                                                                                         |                                                                                               |
| NHS EED                                                                                                                                                                                        |                                                                                               |
| <b>5. Summary of search</b>                                                                                                                                                                    |                                                                                               |

| <b>Systematic reviews</b>                                           |     |
|---------------------------------------------------------------------|-----|
| Number of records retrieved from databases                          | 317 |
| Number of additional records received from other sources            | 1   |
| Total number of records retrieved after removal of duplicates       | 318 |
| Number of records excluded by relevance screening                   | 293 |
| Number of articles excluded by exclusion criteria:                  |     |
| ○ Unsuitable article type, e.g. non-systematic review or editorial  |     |
| ○ Unsuitable study population to address our research question      |     |
| ○ Unsuitable intervention/exposure to address our research question |     |
| ○ Unsuitable outcome to address our research question               | 24  |
| ○ Updated or repetition of other similar review by same authors     |     |
| ○ Other (specify)                                                   |     |
| Number of articles excluded by critical appraisal                   | 0   |
| <i>Total number of articles retained for inclusion</i>              | 1   |



| Search Results Table: MASTER       |                                                                                                                                                                                                                                                                                                                                                                                                                                                                                                                                                                                                                                                                                                                                                                                                                                                                                                                                                            |                       |                           |                            |                                |        |                                                      |        |                                      |       |
|------------------------------------|------------------------------------------------------------------------------------------------------------------------------------------------------------------------------------------------------------------------------------------------------------------------------------------------------------------------------------------------------------------------------------------------------------------------------------------------------------------------------------------------------------------------------------------------------------------------------------------------------------------------------------------------------------------------------------------------------------------------------------------------------------------------------------------------------------------------------------------------------------------------------------------------------------------------------------------------------------|-----------------------|---------------------------|----------------------------|--------------------------------|--------|------------------------------------------------------|--------|--------------------------------------|-------|
| Database                           | Search string                                                                                                                                                                                                                                                                                                                                                                                                                                                                                                                                                                                                                                                                                                                                                                                                                                                                                                                                              | No. of papers         |                           |                            |                                |        |                                                      |        |                                      |       |
|                                    |                                                                                                                                                                                                                                                                                                                                                                                                                                                                                                                                                                                                                                                                                                                                                                                                                                                                                                                                                            | Initial no. retrieved | Dupli- cates <sup>a</sup> | Total no. excl- duplicates | Relevance screening of records |        | Application of Inclusion/Exclusion Criteria to paper |        | Critical appraisal (final selection) |       |
|                                    |                                                                                                                                                                                                                                                                                                                                                                                                                                                                                                                                                                                                                                                                                                                                                                                                                                                                                                                                                            |                       |                           |                            | Exclude                        | Retain | Exclude                                              | Retain | Exclude                              | Final |
| <b>Systematic reviews</b>          |                                                                                                                                                                                                                                                                                                                                                                                                                                                                                                                                                                                                                                                                                                                                                                                                                                                                                                                                                            |                       |                           |                            |                                |        |                                                      |        |                                      |       |
| Medline 1946 to present (02/08/12) | <p>11. coordinat*.mp. OR care coordinat*.mp. OR patient navigat*.mp. OR nurse case manag*.mp. OR clinical nurse specialist.mp. OR nurse practitioner.mp. OR nurse specialist.mp. OR case manage*.mp. OR key worker.mp OR liaison officer.mp. OR Case Management/cl, ec, og [Classification, Economics, Organization &amp; Administration] OR Nurse Clinicians/cl, ec, ed, og, st, sd [Classification, Economics, Education, Organization &amp; Administration, Standards, Supply &amp; Distribution OR Nurse Practitioners/cl, ec, ed, st [Classification, Economics, Education, Standards] [137656]</p> <p>12. cancer.mp. or Neoplasms/ [987792]</p> <p>13. Treatment.mp. or Therapeutics/ OR therapy.mp. OR surgery or *general Surgery/ or *colorectal surgery OR chemotherapy.mp. or Drug Therapy/ [4108650]</p> <p>14. Coverage or access [193319]</p> <p>15. 1 and 2 and 3 and 4 [130]</p> <p>16. limit 5 to (English language and humans) [116]</p> |                       |                           |                            |                                |        |                                                      |        |                                      |       |

|                                                                                                                          |                                                                                                                                                                                                                                                                                                                                                                                                                                                                                                                                                                                                                                                                                                                                                                                                                                                                                                                                                                                                                |                                           |   |     |     |    |    |   |   |   |
|--------------------------------------------------------------------------------------------------------------------------|----------------------------------------------------------------------------------------------------------------------------------------------------------------------------------------------------------------------------------------------------------------------------------------------------------------------------------------------------------------------------------------------------------------------------------------------------------------------------------------------------------------------------------------------------------------------------------------------------------------------------------------------------------------------------------------------------------------------------------------------------------------------------------------------------------------------------------------------------------------------------------------------------------------------------------------------------------------------------------------------------------------|-------------------------------------------|---|-----|-----|----|----|---|---|---|
|                                                                                                                          | 17. limit 6 to "reviews (maximises specificity)" [0]                                                                                                                                                                                                                                                                                                                                                                                                                                                                                                                                                                                                                                                                                                                                                                                                                                                                                                                                                           |                                           |   |     |     |    |    |   |   |   |
|                                                                                                                          | 18. limit 6 to "reviews (best balance of sensitivity and specificity)" [0]                                                                                                                                                                                                                                                                                                                                                                                                                                                                                                                                                                                                                                                                                                                                                                                                                                                                                                                                     |                                           |   |     |     |    |    |   |   |   |
|                                                                                                                          | 19. limit 6 to "review articles" [18]<br>20. remove duplicates from 9 [0]                                                                                                                                                                                                                                                                                                                                                                                                                                                                                                                                                                                                                                                                                                                                                                                                                                                                                                                                      | 18                                        | 0 | 18  | 13  | 5  | 5  | 0 | 0 | 0 |
| NZ MoH<br>(05/09/12)                                                                                                     | Manual search: cancer care coordinators                                                                                                                                                                                                                                                                                                                                                                                                                                                                                                                                                                                                                                                                                                                                                                                                                                                                                                                                                                        | 286                                       | 0 | 286 | 267 | 19 | 19 | 0 | 0 | 0 |
| Cochrane Library:<br>Cochrane Database of Systematic Reviews, DARE, HTA Database and NHS EED<br>1946 -2012<br>(05/09/12) | 14. (coordinat*) or (care coordinat*) or (patient navigation*) or (nurse case manage*) or (clinical nurse specialist) or (nurse specialist) or (nurse practitioner*) or (case manage*) or (key worker) or (liaison officer) [7135] [Title, Abstract of Keywords]<br>15. MeSH descriptor <b>Case Management</b> , this term only or MeSH descriptor <b>Nurse Clinicians</b> , this term only or MeSH descriptor <b>Nurse Practitioners</b> , this term only [969]<br>16. #1 or #2 [7211]<br>17. (cancer)[4203] [Title, Abstract of Keywords]<br>18. MeSH descriptor <b>Neoplasms</b> , this term only [4061]<br>19. #4 or #5 [47900]<br>20. (treatment) or (therapy) or (surgery) or (chemotherapy) [30017] [Title, Abstract of Keywords]<br>21. MeSH descriptor <b>Therapeutics</b> , this term only or MeSH descriptor <b>General Surgery</b> , this term only or MeSH descriptor <b>Drug Therapy</b> , this term only [740]<br>22. #7 or #8 [435146]<br>23. (coverage) or (access) [360] [Title, Abstract of | 13 (1 review, 11 trials, 1 methods study) | 0 | 13  | 13  | 0  | 0  | 0 | 0 | 0 |

|                                                     | <i>Keywords]</i><br>24. #3 and #6 and #9 and #10 [13] |            |          |            |            |           |           |          |          |          |
|-----------------------------------------------------|-------------------------------------------------------|------------|----------|------------|------------|-----------|-----------|----------|----------|----------|
| Snowballing                                         |                                                       | 0          | 0        | 0          | 0          | 0         | 0         | 0        | 0        | <b>0</b> |
| Information Foraging<br>(google scholar and google) | <i>Goodwin et al</i>                                  | 1          | 0        | 1          | 0          | 1         | 0         | 1        | 0        | <b>1</b> |
| <b>Total</b>                                        |                                                       | <b>318</b> | <b>0</b> | <b>318</b> | <b>293</b> | <b>25</b> | <b>24</b> | <b>1</b> | <b>0</b> | <b>1</b> |

9 **Table 3: 'Quality of life' systematic literature search for systematic reviews**

|                                                                                                                                                                                                |                                                                                               |
|------------------------------------------------------------------------------------------------------------------------------------------------------------------------------------------------|-----------------------------------------------------------------------------------------------|
| <b>Literature Search Summary Form</b>                                                                                                                                                          |                                                                                               |
| Date: 12/09/2012                                                                                                                                                                               |                                                                                               |
| <b>1. Research question defined</b>                                                                                                                                                            |                                                                                               |
| <i>Do cancer care coordinators improve quality of life for patients?</i>                                                                                                                       |                                                                                               |
| P (population) = patients with cancer                                                                                                                                                          |                                                                                               |
| I (intervention/exposure and setting) = nurse-led care coordination intervention                                                                                                               |                                                                                               |
| C (Comparisons) = baseline care with no care coordinator roles in place                                                                                                                        |                                                                                               |
| O (outcome) = improved patients' quality of life                                                                                                                                               |                                                                                               |
| T (timeframe) = following cancer diagnosis                                                                                                                                                     |                                                                                               |
| <b>2. Defined Inclusion and Exclusion Criteria</b>                                                                                                                                             |                                                                                               |
| <u>Inclusion</u>                                                                                                                                                                               | <u>Exclusion</u>                                                                              |
| Nurse-led patient-level coordination intervention                                                                                                                                              | Systems-level coordination intervention                                                       |
| Hospital based intervention                                                                                                                                                                    | Community based intervention                                                                  |
| Intervention matches our care coordinator intervention specification i.e. face to face contact with patient                                                                                    | Solely telephone-based interventions or other non-face to face patient contact interventions. |
| Studies that measure quality of life on an internationally recognised scale                                                                                                                    |                                                                                               |
| <b>Systematic reviews</b>                                                                                                                                                                      |                                                                                               |
| All systematic reviews relevant to the research question published from 1946 onwards                                                                                                           | Opinion pieces, non-systematic reviews                                                        |
| All other specific inclusion and exclusion criteria as defined above                                                                                                                           |                                                                                               |
| <b>3. Explicit search strategy</b>                                                                                                                                                             |                                                                                               |
| <u>Keywords</u>                                                                                                                                                                                | <u>Medical Subject Headings (MeSH terms)</u>                                                  |
| coordinat* OR care coordinat* OR patient navigat* OR nurse case manag* OR clinical nurse specialist OR nurse specialist OR nurse practitioner OR case manage* OR key worker OR liaison officer | case management OR nurse clinicians OR nurse practitioners                                    |
| Cancer                                                                                                                                                                                         | Neoplasms                                                                                     |
| Quality of life                                                                                                                                                                                |                                                                                               |
| <u>Limits</u>                                                                                                                                                                                  |                                                                                               |
| English language. Humans. Reviews (maximises specificity)                                                                                                                                      |                                                                                               |
| <b>4. Sources used</b>                                                                                                                                                                         |                                                                                               |
| Medline                                                                                                                                                                                        | Cochrane library                                                                              |
| DARE and HTA databases                                                                                                                                                                         | Ministry of Health Publications                                                               |
| <b>Economic papers</b>                                                                                                                                                                         |                                                                                               |
| NHS EED                                                                                                                                                                                        |                                                                                               |
| <b>5. Summary of search</b>                                                                                                                                                                    |                                                                                               |

| <b>Systematic reviews</b>                                           |     |
|---------------------------------------------------------------------|-----|
| Number of records retrieved from databases                          | 381 |
| Number of additional records received from other sources            | 22  |
| Total number of records retrieved after removal of duplicates       | 403 |
| Number of records excluded by relevance screening                   | 364 |
| Number of articles excluded by exclusion criteria:                  | 35  |
| ○ Unsuitable article type, e.g. non-systematic review or editorial  |     |
| ○ Unsuitable study population to address our research question      |     |
| ○ Unsuitable intervention/exposure to address our research question |     |
| ○ Unsuitable outcome to address our research question               |     |
| ○ Updated or repetition of other similar review by same authors     |     |
| ○ Other (specify)                                                   |     |
| Number of articles excluded by critical appraisal                   | 0   |
| <i>Total number of articles retained for inclusion</i>              | 4   |

| Search Results Table: MASTER       |                                                                                                                                                                                                                                                                                                                                                                                                                                                                                                                                                                                                                                                       |                       |                          |                           |                                |        |                                                      |        |                                      |       |
|------------------------------------|-------------------------------------------------------------------------------------------------------------------------------------------------------------------------------------------------------------------------------------------------------------------------------------------------------------------------------------------------------------------------------------------------------------------------------------------------------------------------------------------------------------------------------------------------------------------------------------------------------------------------------------------------------|-----------------------|--------------------------|---------------------------|--------------------------------|--------|------------------------------------------------------|--------|--------------------------------------|-------|
| Database                           | Search string                                                                                                                                                                                                                                                                                                                                                                                                                                                                                                                                                                                                                                         | No. of papers         |                          |                           |                                |        |                                                      |        |                                      |       |
|                                    |                                                                                                                                                                                                                                                                                                                                                                                                                                                                                                                                                                                                                                                       | Initial no. retrieved | Dupli cates <sup>a</sup> | Total no. excl duplicates | Relevance screening of records |        | Application of Inclusion/Exclusion Criteria to paper |        | Critical appraisal (final selection) |       |
|                                    |                                                                                                                                                                                                                                                                                                                                                                                                                                                                                                                                                                                                                                                       |                       |                          |                           | Exclude                        | Retain | Exclude                                              | Retain | Exclud e                             | Final |
| <b>Systematic reviews</b>          |                                                                                                                                                                                                                                                                                                                                                                                                                                                                                                                                                                                                                                                       |                       |                          |                           |                                |        |                                                      |        |                                      |       |
| Medline 1946 to present (02/08/12) | <p>21. coordinat*.mp. OR care coordinat*.mp. OR patient navigat*.mp. OR nurse case manag*.mp. OR clinical nurse specialist.mp. OR nurse practitioner.mp. OR nurse specialist.mp. OR case manage*.mp. OR key worker.mp OR liaison officer.mp. OR Case Management/cl, ec, og [Classification, Economics, Organization &amp; Administration] OR Nurse Clinicians/cl, ec, ed, og, st, sd [Classification, Economics, Education, Organization &amp; Administration, Standards, Supply &amp; Distribution OR Nurse Practitioners/cl, ec, ed, st [Classification, Economics, Education, Standards] [137656]</p> <p>22. cancer.mp. or Neoplasms/ [987792]</p> |                       |                          |                           |                                |        |                                                      |        |                                      |       |

|                                                                                  |                                                                                                                                                                                                                                                                                                                                                                                                                                                                          |                                                                    |   |     |     |    |    |   |   |   |
|----------------------------------------------------------------------------------|--------------------------------------------------------------------------------------------------------------------------------------------------------------------------------------------------------------------------------------------------------------------------------------------------------------------------------------------------------------------------------------------------------------------------------------------------------------------------|--------------------------------------------------------------------|---|-----|-----|----|----|---|---|---|
|                                                                                  | <p>23. quality of life.mp or *Quality of Life"/ [156298</p> <p>24. 1 and 2 and 3 [243]</p> <p>25. limit 4 to (English language and humans) [212]</p>                                                                                                                                                                                                                                                                                                                     |                                                                    |   |     |     |    |    |   |   |   |
|                                                                                  | <p>26. limit 5 to "reviews "reviews (best balance of sensitivity and specificity)"[3]</p> <p>27. remove duplicates from 6 [0]</p>                                                                                                                                                                                                                                                                                                                                        | 3                                                                  | 0 | 3   | 3   | 0  | 0  | 0 | 0 | 0 |
| NZ MoH<br>(05/09/12)                                                             | Manual search: cancer care coordinators                                                                                                                                                                                                                                                                                                                                                                                                                                  | 286                                                                | 0 | 286 | 267 | 19 | 19 | 0 | 0 | 0 |
| Cochrane Library:<br>Cochrane Database of Systematic Reviews, DARE, HTA Database | <p>25. (coordinat*) or (care coordinat*) or (patient navigation*) or (nurse case manage*) or (clinical nurse specialist) or (nurse specialist) or (nurse practitioner*) or (case manage*) or (key worker) or (liaison officer) [7122] [Title, Abstract of Keywords]</p> <p>26. MeSH descriptor <b>Case Management</b>, this term only or MeSH descriptor <b>Nurse Clinicians</b>, this term only or MeSH descriptor <b>Nurse Practitioners</b>, this term only [969]</p> | 92 (15 reviews, 72 Trials, 4 Methods studies, 1 Economic evaluatio | 0 | 92  | 91  | 1  | 1  | 0 | 0 | 0 |

|                                                                                         |                                                                                                                                                                                                                                                                                                                                                                         |            |          |            |            |           |           |          |          |          |
|-----------------------------------------------------------------------------------------|-------------------------------------------------------------------------------------------------------------------------------------------------------------------------------------------------------------------------------------------------------------------------------------------------------------------------------------------------------------------------|------------|----------|------------|------------|-----------|-----------|----------|----------|----------|
| and NHS<br>EED<br>1946 -2012<br>(14/09/12)                                              | 27. #1 or #2 [7198]<br>28. (cancer)[4198] <i>[Title, Abstract of Keywords]</i><br>29. MeSH descriptor <b>Neoplasms</b> , this term only [4058]<br>30. #4 or #5 [47766]<br>31. (quality of life) [3198] <i>[Title, Abstract of Keywords]</i><br>32. MeSH descriptor <b>Quality of Life</b> , this term only [11993]<br>33. #7 or #8 [23358]<br>34. #3 and #6 and #9 [92] | n)         |          |            |            |           |           |          |          |          |
| Snowballin<br>g and<br>Informatio<br>n Foraging<br>(google<br>scholar<br>and<br>google) |                                                                                                                                                                                                                                                                                                                                                                         | 22         | 0        | 22         | 3          | 19        | 15        | 4        | 0        | 4        |
| <b>Total</b>                                                                            |                                                                                                                                                                                                                                                                                                                                                                         | <b>403</b> | <b>0</b> | <b>403</b> | <b>364</b> | <b>39</b> | <b>35</b> | <b>4</b> | <b>0</b> | <b>4</b> |
