# Supplementary material for: Cancer care coordinators in stage III colon cancer: a cost-utility analysis
Source: Springer Nature journal article supplement (doi:10.1186/s12913-015-0970-5), 2015-08-04
Supplement: MOESM4 [file 9757516]

# Additional File 5: Baseline health system costs by disease state For ‘Cancer care coordinators in Stage III colon cancer: a cost-utility analysis’

---

Tony Blakely<sup>1‡</sup>, Lucie Collinson<sup>1</sup>, Giorgi Kvizhinadze<sup>1</sup>, Nisha Nair<sup>1</sup>, Rachel Foster<sup>1</sup>, Elizabeth Dennett<sup>2</sup>,  
Diana Sarfati<sup>1</sup>

<sup>1</sup>Burden of Disease Epidemiology, Equity, and Cost-Effectiveness (BODE<sup>3</sup>) Programme, Department  
of Public Health, University of Otago Wellington, PO Box 7343, Wellington, New Zealand

<sup>2</sup>Department of Surgery, University of Otago Wellington, PO Box 7343, Wellington, New Zealand

<sup>‡</sup>corresponding author

## Contents

|                                                                        |   |
|------------------------------------------------------------------------|---|
| ADDITIONAL FILE 5: BASELINE HEALTH SYSTEM COSTS BY DISEASE STATE ..... | 2 |
| Population health system costs .....                                   | 3 |
| Colon cancer stage III health system costs .....                       | 4 |
| Chemotherapy costs .....                                               | 6 |
| REFERENCES .....                                                       | 9 |

## 1 **Additional File 5: Baseline health system costs by disease state**

2 Baseline health system costs (except receipt of chemotherapy; see below) were determined using  
3 data from the Ministry of Health that through a national unique identifier brings together all  
4 hospital, outpatient, pharmaceutical and laboratory events, and some primary care event and  
5 private hospital event data (so-called HealthTracker costs). This data has become reliable from about  
6 2006. Each event is then assigned a unit cost, making it possible to determine annual, monthly or  
7 other costs per person, and type of person (e.g. cancer patient in certain phase of cancer journey).  
8 About 80% of all Government Vote Health expenditure can be attributed to separate events by  
9 individual New Zealand residents. New Zealand has a capitated funding formula for primary care, so  
10 an average cost is assigned to all residents based on their sex, age, ethnicity and deprivation  
11 (variables used in the capitation funding formula). Thus the primary care costs are ‘expectations’ and  
12 will (say) underestimate resource use for a cancer patient also seeing their general practitioner more  
13 frequently than the average for someone of the same demographic group.

14 At the time of writing this paper, private or out of pocket health expenditure has not been included  
15 in the baseline health system costs. This will result in an underestimate for primary care and private  
16 hospital or physician utilisation. However, it should not be too severe for colon cancer costs which  
17 are largely public and hospital-based.

18 Costs are calculated separately by sex and age – but not by ethnicity and deprivation. There are two  
19 reasons for this decision. First, due to different usage of private health care (and out of pocket) by  
20 ethnicity and deprivation, any differences by ethnicity and deprivation in costs observed with  
21 HealthTracker are likely to be (in part at least) of these unobserved differences at the margin.  
22 Second, it is a moot point whether current differences in health service utilisations by ethnicity and  
23 deprivation are appropriate or fair.

24 The remainder of this file is in three sections:

- 25 • Population health system costs. That is health system costs of an average New Zealander by  
26 sex and age, regardless of disease status. We use these costs for two purposes: for health  
27 system costs beyond the eight year cure time for colon cancer (i.e. unrelated future health  
28 system costs); to assist calculating excess health system costs due to colon cancer.
- 29 • Excess colon cancer health system costs.
- 30 • Costs of receipt of chemotherapy.

### 31 **Population health system costs**

32 Two datasets were created: one for costs and person time occurring not in the last six months of life,  
33 and one for its complement of costs and person time in the last six months of life. This follows the  
34 recommendations of van Baal to specify costs near the end of life separately[1] , and as described in  
35 the BODE<sup>3</sup> protocol[2]. For each dataset, averaged health system costs per person-month for the  
36 whole population were calculated for all cross-classified strata of sex by age (5-year age-groups) by  
37 ethnicity (Māori, non-Māori) by deprivation (three categories) by calendar year (2007, 08, 09, 10,  
38 11). Gamma regression was then used to generate smoothed estimates of health system costs. For  
39 reasons explained above, ethnicity and deprivation were not included as covariates in this model,  
40 although the input data was disaggregated by these strata. Each age group was assigned its mid-  
41 point age in years, minus 62.5 so as to centre age on the 60-64 year age group. The dependent  
42 variable itself was the logarithm of average cost per person-month in each strata. As the input data  
43 to the regressions was grouped, the regressions were weighted by the total number of people  
44 contributing person-time. The estimated costs per person month are shown in Table 1 below, and  
45 the regression coefficients given in footnotes.

46 **Table 1: Population health system baseline costs (\$NZ) per person-month, by sex and age,**  
 47 **and by whether in the last six months of life or not. Adults aged 45 years and older only.**

48

| Age        | Not in last six months of life |         | In last six months of life |         |
|------------|--------------------------------|---------|----------------------------|---------|
|            | Males                          | Females | Males                      | Females |
| 45-49 yrs. | 110                            | 124     | 1070                       | 1296    |
| 50-54 yrs. | 136                            | 153     | 1148                       | 1391    |
| 55-59 yrs. | 168                            | 189     | 1248                       | 1511    |
| 60-64 yrs. | 208                            | 234     | 1369                       | 1658    |
| 65-69 yrs. | 255                            | 287     | 1514                       | 1834    |
| 70-74 yrs. | 307                            | 345     | 1682                       | 2037    |
| 75-79 yrs. | 359                            | 404     | 1873                       | 2268    |
| 80-84 yrs. | 404                            | 454     | 2085                       | 2525    |
| 85-89 yrs. | 433                            | 488     | 2314                       | 2803    |
| 90-94 yrs. | 440                            | 495     | 2554                       | 3094    |

49 Gamma regression model coefficients (s.e.).

50 • Not in last six months of life: Intercept 5.372 (7.572e-02), age 4.201e-02 (2.814e-03), males 1.183e-01 (5.979e-02),  
 51 year 4.172e-02 (2.112e-02), age squared 2.015e-04 (1.452e-04), age cubed 1.228e-05 (2.223e-06)

52 • Last 6 month of life: Intercept 7.425 (2.657e-02), age 1.944e-02 (1.117e-03), males 1.916e-01 (2.059e-02), year  
 53 5.941e-03 (7.636e-03), age squared 1.486e-04 (2.584e-05), age cubed 3.456e-06 (7.367e-07).

54

### 55 **Colon cancer stage III health system costs**

56 The HealthTracker data was restricted to people diagnosed with SEER regional extent of disease  
 57 stage colon cancer – a reasonable match with stage III. A period window of July 2006 to June 2010  
 58 was used. Cancer patients diagnosed since 1998 were included, meaning that there was a full range  
 59 of times since diagnosis (up to the eight year statistical cure time). The data was cross-classified as  
 60 above, but rather than using ‘not within 6 months of death’ and ‘within 6 months of death’ the  
 61 cancer disease model categories were used: diagnosis and treatment (DT), remission (R), pre-  
 62 terminal (PT) and terminal (T). Thus all person-time within nine months of diagnosis contributed to  
 63 the average DT costs, and likewise all costs in the last month of life for those dying of colon cancer  
 64 contributed to T and within the fourth to second to last month of life if dying of colon cancer  
 65 contributed to PT. Regarding R costs, they are any residual time from the 10<sup>th</sup> month post diagnosis  
 66 to the 96<sup>th</sup> month (8 years) if a survivor, or from the 10<sup>th</sup> month post-diagnosis to the 5<sup>th</sup> (inclusive)  
 67 to last month of life if dying from colon cancer.

68 Within each stratum, the observed average cost per month was calculated (top panel, Table 2). Then  
69 the 'excess cost' was calculated by subtracting the matching population costs for the population 'not  
70 in the last six months of life' (Table 1 above). Any negative values were replaced with \$1 per person  
71 month (i.e. due to the population cost by chance being greater than any of the cancer strata costs  
72 (due to sparse data), which occurred in one instance). These excess costs were then submitted to a  
73 gamma regression model to calculate smoothed excess costs by sex by age by clinical phase. Forced  
74 main effects included: sex; age (continuous variable using mid-point of each category, centred on  
75 62.5 years), and cancer state (DT, R, PT, and T). Age (centred) squared and an interaction of age with  
76 cancer state, were included. The regression-based estimates are shown in the bottom panel of Table  
77 2, and the regression equation coefficients and standard errors are shown in Table 3.

78 **Table 2: Observed total (averaged over 2006/07 to 2009/10) and regression estimated**  
79 **excess costs per person month for stage III colon cancer**

|                                                      | Males |      |      |       | Females |     |       |        |
|------------------------------------------------------|-------|------|------|-------|---------|-----|-------|--------|
| Age                                                  | DT    | R    | PT   | T     | DT      | R   | PT    | T      |
| <b>Observed total average costs per person month</b> |       |      |      |       |         |     |       |        |
| 45-49 yrs.                                           | 5254  | 1000 | 6031 | 5715  | 5242    | 409 | 2039  | 138193 |
| 50-54 yrs.                                           | 4105  | 533  | 6215 | 15733 | 4414    | 477 | 8426  | 6448   |
| 55-59 yrs.                                           | 4419  | 437  | 3756 | 14463 | 3778    | 353 | 9871  | 12889  |
| 60-64 yrs.                                           | 4811  | 606  | 3479 | 10655 | 4115    | 304 | 3788  | 8792   |
| 65-69 yrs.                                           | 4733  | 621  | 4466 | 12277 | 3942    | 179 | 6499  | 15511  |
| 70-74 yrs.                                           | 4475  | 440  | 4798 | 11125 | 4054    | 238 | 3701  | 20690  |
| 75-79 yrs.                                           | 3913  | 745  | 3148 | 12744 | 3475    | 51  | 15205 | 20783  |
| 80-84 yrs.                                           | 3695  | 515  | 2054 | 17668 | 3211    | 114 | 2969  | 15058  |
| 85-89 yrs.                                           | 3770  | 414  | 1983 | 21700 | 2909    | 186 | 2946  | 17181  |
| 90-94 yrs.                                           | 2754  | 662  | 2102 | 30254 | 2241    | 337 | 504   | 36690  |
| <b>Gamma regression modelled excess cancer costs</b> |       |      |      |       |         |     |       |        |
| 45-49 yrs.                                           | 7293  | 689  | 9846 | 18386 | 6121    | 579 | 8264  | 15433  |
| 50-54 yrs.                                           | 6004  | 515  | 7574 | 16554 | 5040    | 433 | 6357  | 13895  |
| 55-59 yrs.                                           | 5118  | 399  | 6032 | 15432 | 4296    | 335 | 5063  | 12954  |
| 60-64 yrs.                                           | 4517  | 320  | 4975 | 14896 | 3792    | 268 | 4176  | 12504  |
| 65-69 yrs.                                           | 4128  | 265  | 4248 | 14888 | 3465    | 223 | 3566  | 12497  |
| 70-74 yrs.                                           | 3906  | 228  | 3756 | 15407 | 3279    | 191 | 3153  | 12932  |
| 75-79 yrs.                                           | 3827  | 203  | 3439 | 16509 | 3213    | 170 | 2886  | 13857  |
| 80-84 yrs.                                           | 3883  | 187  | 3260 | 18317 | 3259    | 157 | 2736  | 15375  |
| 85-89 yrs.                                           | 4079  | 178  | 3199 | 21042 | 3424    | 149 | 2686  | 17662  |
| 90-94 yrs.                                           | 4436  | 176  | 3252 | 25029 | 3724    | 147 | 2729  | 21008  |

80

81 **Table 3: Gamma regression output for model of excess costs**

|                          | <b>Estimate</b> | <b>Std.error</b> | <b>P-value</b> |
|--------------------------|-----------------|------------------|----------------|
| Intercept                | 8.24            | 0.12             | <0.01          |
| Females (males referent) | 0.18            | 0.09             | 0.05           |
| Remission (R) †          | -2.65           | 0.13             | <0.01          |
| Pre-terminal (PT) †      | 0.10            | 0.28             | 0.73           |
| Terminal (T) †           | 1.19            | 0.29             | <0.01          |
| Age                      | -0.021          | 0.01             | 0.03           |
| Age squared              | 0.00070         | 0.00034          | 0.04           |
| Age*R                    | -0.019          | 0.010            | 0.05           |
| Age*PT                   | -0.014          | 0.019            | 0.49           |
| Age*T                    | 0.018           | 0.020            | 0.37           |

82 † Referent category DT

83 Beyond the cure time of 96 months (8 years), survivors are assigned the average HealthTracker cost  
 84 per month for someone of the same sex and age group, i.e. those in Table 1. That is, we include  
 85 unrelated health care costs in the model beyond the colon cancer disease.

### 86 **Chemotherapy costs**

87 It was not possible to accurately identify, and determine baseline costs, for people receiving  
 88 chemotherapy from HealthTracker. Therefore, we undertook a bottom-up costing of chemotherapy  
 89 as follows: cost of chemotherapy itself; cost of staff time and out-patient's attendances. We chose  
 90 the FOLFOX4 chemotherapy regimen (see Box 1)[3] as:

- 91 • this is a commonly prescribed regimen in New Zealand for colon cancer patients stage III  
 92 along with other FOLFOX regimens.
- 93 • it is recommend by New Zealand Guidelines Group[4]
- 94 • it concords with the treatment regimen from in the literature used for intervention input  
 95 parameters as described in Table 1 of the main paper.

96 We calculated the costs for the FOLFOX4 regimen for the total six month cost and per cycle. Each  
 97 cycle lasts two days and is every two weeks so there are 12 cycles overall. The acquisition cost of the  
 98 drugs was sought from the Pharmaceutical Schedule August 2011. The outpatient chemotherapy  
 99 costs were from National Pricing Outpatient Purchase Unit for DHBs (2011). The number of

100 outpatient oncology appointments with an oncologist was provided by a local key informant  
101 (consultant oncologist) as 6-12 (every 2-4 weeks ;patients are usually seen by an oncologist at the  
102 start of every cycle but there is a moving trend to seeing patients every other cycle). We chose to  
103 cost six outpatient appointments with an oncologist assuming that each appointment at the start of  
104 each new cycle would be shorter in length than an average oncology appointment costed by the  
105 National Pricing Outpatient Purchase Unit for DHBs (2011).

106 We then recalculated the DT costs for months 4 to 9 (inclusive) such that the average was  
107 maintained (using the baseline proportion of people receiving chemotherapy), but costs for those  
108 people receiving chemotherapy were \$17811.78 greater (per patient) than those not receiving  
109 chemotherapy.

110 We did not include knock on costs of complications secondary to chemotherapy as the incidence of  
111 these is low. The incidence of febrile neutropenia with FOLFOX4 is 1.8%, the incidence of  
112 gastrointestinal adverse effects is low and the incidence of grade 3 sensory neuropathy was 12.4 %  
113 during treatment, decreasing to 1.1 % at one year of follow-up[3]. In addition, there is minimal  
114 treatment available for sensory neuropathy which gave us further reason not to cost it.

115 **Box 1: Chemotherapy treatment outline FOLFOX4**

**Treatment Outline FOLFOX 4 [3]**

Oxaliplatin 85mg/m<sup>2</sup> IV infusion over 2 hours - **day 1**

Calcium folinate (folinic acid) 200 mg/m<sup>2</sup> IV infusion over 2 hours - **days 1 & 2**

5-Fluorouracil 400mg/m<sup>2</sup> IV slow push - **days 1 & 2**

5-Fluorouracil 600 mg/m<sup>2</sup> IV infusion over 22 hours via Folfusor device – **days 1 & 2**

116 **Table 4: Baseline costs for chemotherapy FOLFOX4 regimen per patient**

| Acquisition cost of drugs                                                                  |                                                                                                                                                                                                                                      |                      |        |                 |                                                        |              |          |                                                              |                                                           |
|--------------------------------------------------------------------------------------------|--------------------------------------------------------------------------------------------------------------------------------------------------------------------------------------------------------------------------------------|----------------------|--------|-----------------|--------------------------------------------------------|--------------|----------|--------------------------------------------------------------|-----------------------------------------------------------|
| Item*                                                                                      | Mean dose of pharmaceutical agent for adult cancer patient                                                                                                                                                                           | No. of units per day |        | Total no. units | Unit cost**                                            | Cost per day |          | Total cost (12 cycles)                                       | Source and comments                                       |
|                                                                                            |                                                                                                                                                                                                                                      | Day 1                | Day 2  | Per cycle       |                                                        | Day 1        | Day 2    |                                                              |                                                           |
| Oxaliplatin (Eloxatin)                                                                     | 85mgx1.8m <sup>2</sup> = 153mg                                                                                                                                                                                                       | 153mg                | 0mg    | 153mg           | \$165 (Inj 50mg = \$55.00, Inj 100mg = \$110.00)       | \$165.00     | \$0      | \$165 x 12 = \$1980.00                                       | Pharmaceutical Schedule August 2011                       |
| Folinic acid (leucovorin, calcium folinate)                                                | 200 x 1.8m <sup>2</sup> = 360mg<br>360x2                                                                                                                                                                                             | 360mg                | 360mg  | 720mg           | \$39.75 (Inj 300mg = \$30, Inj 100mg = \$9.75)         | \$39.75      | \$39.75  | \$79.50 x 12 = \$954.00                                      | Pharmaceutical Schedule August 2011                       |
| Fluorouracil (5-FU) IV slow push                                                           | 400 x 1.8m <sup>2</sup> =720mg                                                                                                                                                                                                       | 720mg                | 720mg  | 1440mg          | \$7.50 (Inj 50mg per ml, 20ml = \$7.50, i.e. 1000mg)   | \$7.50       | \$7.50   | \$15 x 12 = \$180.00                                         | Pharmaceutical Schedule August 2011                       |
| Fluorouracil (5-FU) IV infusion                                                            | 600 x 1.8m <sup>2</sup> = 1080                                                                                                                                                                                                       | 1080mg               | 1080mg | 2160mg          | \$13.55 (Inj 25mg per ml, 100ml = \$13.55 i.e. 2500mg) | \$13.55      | \$13.55  | \$27.10 x 12 = \$325.20                                      | Pharmaceutical Schedule August 2011                       |
| <b>Total drug acquisition cost</b>                                                         |                                                                                                                                                                                                                                      |                      |        |                 |                                                        |              |          | \$3439.20                                                    |                                                           |
| <b>Cost of staff time and out-patient's attendances to receive chemotherapy</b>            |                                                                                                                                                                                                                                      |                      |        |                 |                                                        |              |          |                                                              |                                                           |
| <b>Outpatient chemotherapy</b>                                                             | An attendance where the purpose is to receive intravenous chemotherapy. Includes all pharmaceuticals administered during the attendance excluding chemotherapy drug cost recovery from Sector Services. Includes day case treatment. |                      |        |                 | \$493.83                                               | \$493.83     | \$493.83 | \$987.66 x 12 = \$11851.92 per cycle                         | National Pricing Outpatient Purchase Unit for DHBs (2011) |
| <b>Outpatient appointments with oncologist during chemotherapy and follow-up</b>           |                                                                                                                                                                                                                                      |                      |        |                 |                                                        |              |          |                                                              |                                                           |
| <b>Oncology outpatient attendance</b>                                                      |                                                                                                                                                                                                                                      |                      |        |                 | \$420.11 per appointment                               |              |          | 6 x \$420.11= \$2520.66                                      | National Pricing Outpatient Purchase Unit for DHBs (2011) |
| <b>Total cost of drugs, plus outpatient attendances, plus appointments with oncologist</b> |                                                                                                                                                                                                                                      |                      |        |                 |                                                        |              |          | = \$3439.20 + 11851.92 +\$2520.66 = \$17811.78 (per patient) |                                                           |

117 \*IV fluids given with the chemo agent (e.g. 5% glucose) are not costed separately as they are included in the outpatient chemotherapy per attendance cost.  
 118 \*\*We have rounded up the dose of each chemotherapy agent to the nearest vial size as suggested by Dooley et al whose work showed by doing this had minimal impact on  
 119 the cost of chemotherapy agents.[5].



## References

1. van Baal P, Feenstra T, Polder J, Hoogenveen R, Brouwer W: **Economic evaluation and the postponement of health care costs.** *Health economics* 2011, **20**(4):432-445.
2. Blakely T, Foster R, Wilson N: **Burden of Disease Epidemiology, Equity and Cost-Effectiveness (BODE3) Study Protocol** In: *Burden of Disease Epidemiology, Equity and Cost-Effectiveness Programme*. Wellington: University of Otago Wellington 2012.
3. Andre T, Boni C, Mounedji-Boudiaf L, Navarro M, Tabernero J, Hickish T, Topham C, Zaninelli M, Clingan P, Bridgewater J, Tabah-Fisch I, de Gramont A: **Oxaliplatin, fluorouracil, and leucovorin as adjuvant treatment for colon cancer.** *N Engl J Med* 2004, **350**(23):2343-2351.
4. New Zealand Guidelines Group: **Management of early colorectal cancer. Evidence-based Best Practice Guideline.** In. Wellington Ministry of Health; 2011.
5. Pollock N, Langtont E, Stowell K, Simpson C, McDonnell N: **Safe duration of postoperative monitoring for malignant hyperthermia susceptible patients.** *Anaesthesia and intensive care* 2004, **32**(4):502-509.
