# Supplementary material for: Cancer care coordinators in stage III colon cancer: a cost-utility analysis
Source: Springer Nature journal article supplement (doi:10.1186/s12913-015-0970-5), 2015-08-04
Supplement: MOESM5 [file 9757516]

# Additional File 4: Event pathway and costing of baseline and intervention For ‘Cancer care coordinators in Stage III colon cancer: a cost-utility analysis’

---

Tony Blakely<sup>1†</sup>, Lucie Collinson<sup>1</sup>, Giorgi Kvizhinadze<sup>1</sup>, Nisha Nair<sup>1</sup>, Rachel Foster<sup>1</sup>, Elizabeth Dennett<sup>2</sup>,  
Diana Sarfati<sup>1</sup>

<sup>1</sup>Burden of Disease Epidemiology, Equity, and Cost-Effectiveness (BODE<sup>3</sup>) Programme, Department  
of Public Health, University of Otago Wellington, PO Box 7343, Wellington, New Zealand

<sup>2</sup>Department of Surgery, University of Otago Wellington, PO Box 7343, Wellington, New Zealand

<sup>†</sup>corresponding author

## Contents

|                                                                                 |    |
|---------------------------------------------------------------------------------|----|
| ADDITIONAL FILE 4: EVENT PATHWAY AND COSTING OF BASELINE AND INTERVENTION ..... | 2  |
| Event pathway .....                                                             | 2  |
| Calculation of intervention costs .....                                         | 5  |
| Resource Use Survey.....                                                        | 5  |
| Additional allied health referrals .....                                        | 9  |
| Uncertainty .....                                                               | 10 |
| REFERENCES .....                                                                | 13 |

## 1 **Additional File 4: Event pathway and costing of baseline and intervention**

2 There are two types of cost to ascribe: routine health system costs, and intervention costs. Health  
3 system costs are those that routinely occur given the health state a patient is in, regardless of  
4 'direct' costs of the intervention; we derive them from a dataset of all New Zealand residents linked  
5 to costs per event and by type of person (so-called HealthTracker data, described in general  
6 elsewhere[1], and more specifically for this economic evaluation in Additional File 5. Intervention  
7 costs as we model them are incremental costs, whereby costs for the CCC intervention (e.g. salaries  
8 and costs arising from direct consequences of the intervention such as increased use of allied  
9 professionals) are summed, then the costs of the comparator (i.e. the costs of current cancer care  
10 services in the absence of cancer care coordinators) are subtracted. It is these incremental costs that  
11 are the focus of this file.

### 12 **Event pathway**

13 The event pathway is in two sections and shown below in Figure 1 and Figure 2. The clinical nurse  
14 specialist (CNS) role is adapted from a description provided by Maria Stapleton, Clinical Nurse  
15 Specialist Colorectal Care, MidCentral District Health Board (DHB). Expert advice was provided by Dr  
16 Elizabeth Dennett, Colorectal surgeon, CCDHB and Dr Andrew Simpson, Medical Oncologist, CCDHB.

17

18

19

Figure 1: Cancer care coordinator intervention pathway for colon cancer stage III from provisional diagnosis to surgery

20

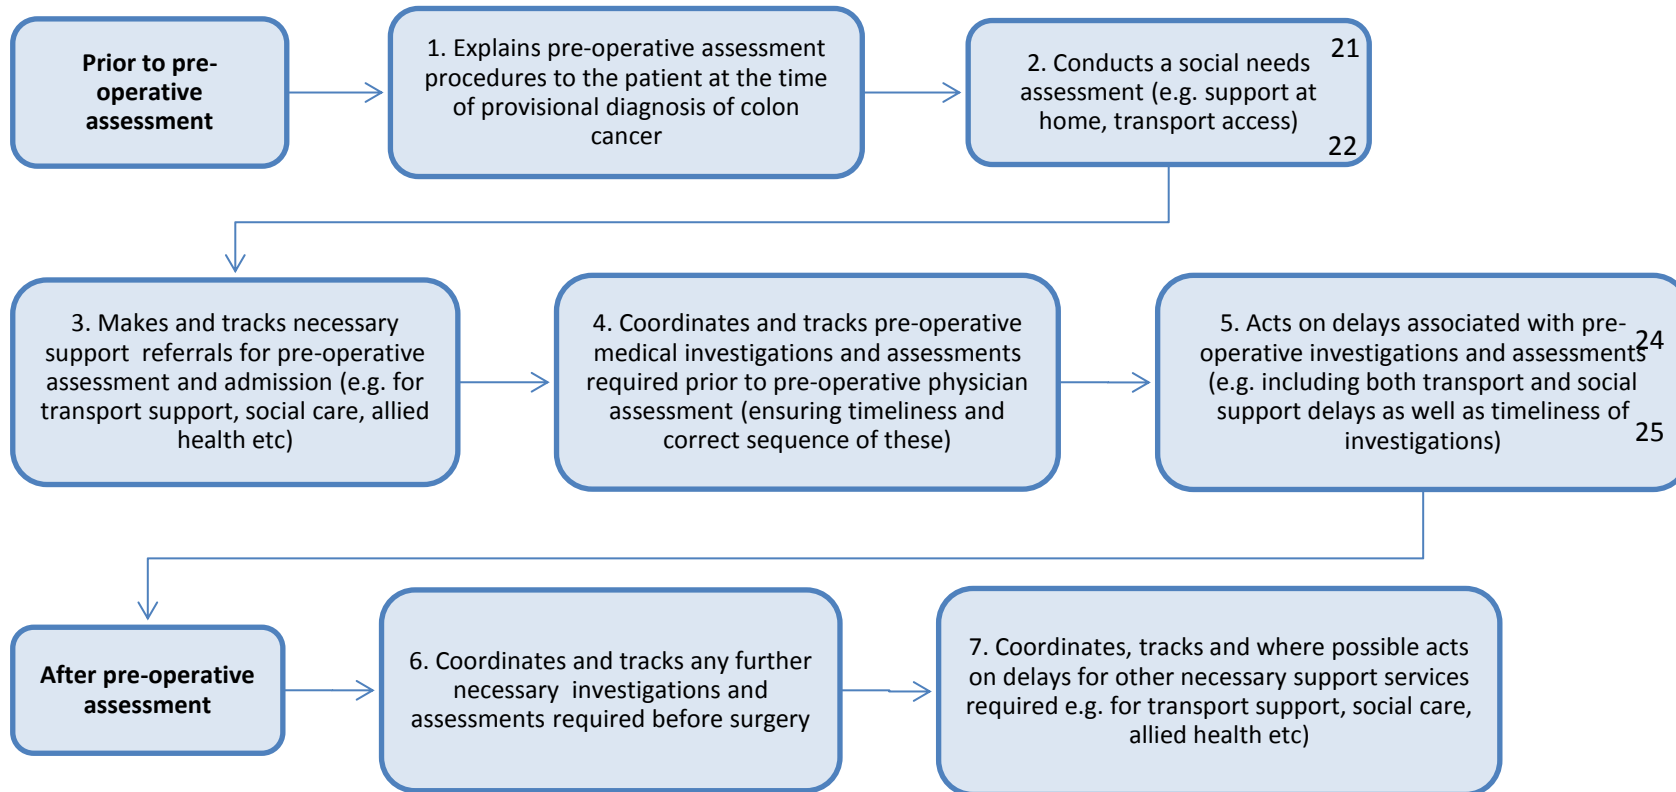

23

26 **Figure 2: Cancer care coordinator intervention pathway for colon cancer stage III from surgery to chemotherapy**

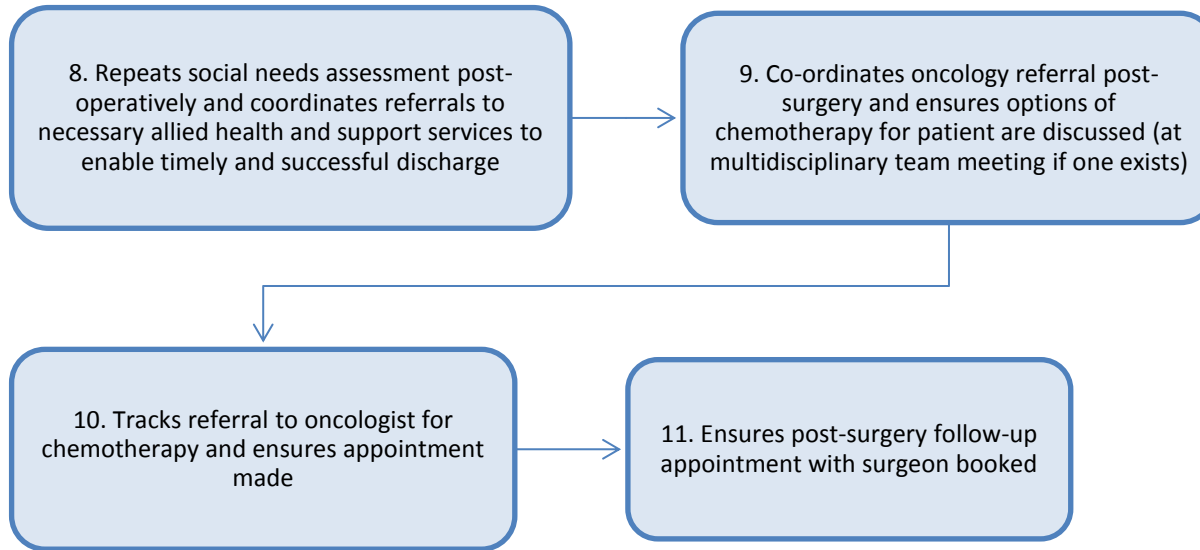

27

## 28 Calculation of intervention costs

29 Our initial calculation was largely a 'desktop' exercise by the authors (RF and LC) using the above  
30 event pathway, available datasets in New Zealand on price per resource unit, and a resource use  
31 survey. The latter survey of health professionals (including a variety of nursing roles, house surgeons,  
32 registrars and consultants; n =16) was to estimate time spent on "coordinating" activities, We  
33 considered care in the time periods from diagnosis to surgery (steps 1-7) and surgery to initiation of  
34 chemotherapy (steps 8-11). Step 10 (tracking oncology referral) in the intervention pathway was not  
35 currently being conducted in any hospital that we surveyed; we estimated a time of 10 minutes for  
36 this activity. We didn't include care during chemotherapy in the intervention as this is already  
37 coordinated by community cancer nurses in New Zealand.

## 38 Resource Use Survey

### 39 Methods

40 The resource use survey was designed so that the questions corresponded with each step in the  
41 event pathway. Survey participants were asked which member(s) of staff (if any) provided each  
42 service for colon cancer patients stage III, the time it took to provide this service per patient per  
43 member of staff (for the average patient and the range for all patients they see). Of note, we  
44 attempted to elicit experts' estimates of the range about the average patient time (i.e. equivalent to  
45 the standard deviation about the mean), but this was too challenging for participants.

46 Health care workers from three hospitals were asked to take part in the survey; Wellington Hospital  
47 and Kenepuru Community Hospital where no specified CCC role currently exists, and Palmerston  
48 North Hospital where a specified nursing role matching parts of our CCC intervention is in place.  
49 Health care workers invited to participate were identified as likely to be carrying out at least one  
50 step in the event pathway either alone or alongside other staff.

51 In the two hospitals where no specific CCC exists twenty-four members of staff were invited to  
52 participate in the survey with twelve completing it (all from Wellington Hospital). Health care  
53 workers with the following roles were asked to participate: colorectal consultant (1), registrars (5),  
54 house surgeons (6), colorectal surgery clinic nurse (n=5), stomal therapy nurse (n=2), pre-assessment  
55 nurse (n=3), patient flow coordinator (n=1) and medical secretary (n=1). The following roles  
56 completed the survey: colorectal consultant (1), registrars (3), house surgeons (2), colorectal surgery  
57 clinic nurse (n=1), stomal therapy nurse (n=2), pre-assessment nurse (n=3). The survey was  
58 completed face to face individually with five participants, face to face collectively with three  
59 participants – providing one estimate between them for each question asked and over the phone  
60 individually with four participants.

61 In the hospital where parts of the CCC intervention were being provided four nursing staff were  
62 asked to participate with 100% response rate. The survey was completed individually by one  
63 colorectal surgery clinic nurse and collectively by three colorectal cancer nurses. We were unable to  
64 meet with these participants face to face, but were in correspondence on the telephone and email  
65 to discuss queries with regards to the survey.

## 66 Analysis

67 For each activity, we calculated the average of the estimates given, using the midpoint of the range  
68 if a point estimate wasn't given.

69 From the data collected in the survey we determined the average amount of time spent by each  
70 type of personnel on each activity. The total time for each phase (provisional diagnosis to surgery;  
71 surgery to initiation of chemotherapy) was calculated separately for hospitals where there was ad  
72 hoc coordination of patient care (comparator) and those where specified roles existed that carried  
73 out some or all of the tasks defined in our CCC programme (intervention).

74 The cost per hour of activity was then calculated based on an average salary for each type of  
 75 personnel, assuming that a CCC would be a CNS[2-4]. As described in Additional File 1 the CCC  
 76 requires the skillset and experience of a CNS in order to know when to seek specialist input and in  
 77 order to be able to answer patients' questions with regards to their management.

78 In line with an opportunity cost approach, we determined that each hour spent on coordinating  
 79 activity was equivalent to the loss of an hour spent on clinical activities directly related to the care of  
 80 an individual patient; we will refer to the latter as "patient-related activity time". We define  
 81 "patient-related activity time" as including all contact with and care of the patient, phone calls,  
 82 emails and other administrative tasks related directly to the care of the individual patient. It  
 83 excludes lunch, morning and afternoon tea breaks, training, meetings (other than those related to  
 84 care of individual patients such as multidisciplinary team meetings (MDTs)), and administration  
 85 related to the professional's organisation rather than individual patients. We applied the salary only  
 86 over the periods of the individual's work time that were potentially patient-related activity time; we  
 87 excluded public holidays, annual leave and sick leave, and assumed that 62.5% of each day was  
 88 patient-related activity time (i.e. 5 hours of an 8 hour day). Overheads of 50% were added to the  
 89 salaries.

90 **Table 1: Resource use survey results and costs (average per patient) for the time periods:**  
 91 **diagnosis to surgery, and; post-surgery to initiation of chemotherapy. Costs include salary**  
 92 **and overheads**

| Time period                                | Number of units (minutes) | Cost per unit (\$) <sup>a</sup> | Total cost (\$) |
|--------------------------------------------|---------------------------|---------------------------------|-----------------|
| <b>Comparator</b>                          |                           |                                 |                 |
| Provisional Diagnosis to surgery           |                           |                                 |                 |
| • Registered nurse                         | 101.88                    | \$1.36                          | \$138.56        |
| • Clinical nurse specialist                | 15.00                     | \$1.76                          | \$26.40         |
| • Registrar                                | 25.63                     | \$1.69                          | \$43.31         |
| • House surgeon                            | 15.42                     | \$1.32                          | \$20.35         |
| • Consultant                               | 14.29                     | \$4.03                          | \$57.59         |
| • Ward Clerk                               | 0                         | \$0.89                          | \$0.00          |
| <i>Subtotal</i>                            | <i>172.20</i>             |                                 | <i>\$286.18</i> |
| Post-surgery to initiation of chemotherapy |                           |                                 |                 |

|                                                         |               |        |                 |
|---------------------------------------------------------|---------------|--------|-----------------|
| • Registered nurse                                      | 28.33         | \$1.36 | \$38.53         |
| • Clinical nurse specialist                             | 15.00         | \$1.76 | \$26.40         |
| • Registrar                                             | 8.33          | \$1.69 | \$14.08         |
| • House surgeon                                         | 24.38         | \$1.32 | \$32.18         |
| • Consultant                                            | 6.25          | \$4.03 | \$25.19         |
| • Ward Clerk                                            | 5.00          | \$0.89 | \$4.45          |
| <i>Subtotal</i>                                         | 87.29         |        | \$140.82        |
| <b>Total</b>                                            | <b>259.49</b> |        | <b>\$427.00</b> |
| <b>Intervention</b>                                     |               |        |                 |
| Diagnosis to surgery                                    |               |        |                 |
| • Registered nurse                                      | 0             | \$1.36 | \$0.00          |
| • Clinical nurse specialist                             | 167.50        | \$1.76 | \$294.80        |
| • Registrar                                             | 7.50          | \$1.69 | \$12.68         |
| • House surgeon                                         | 0             | \$1.32 | \$0.00          |
| • Consultant                                            | 9.50          | \$4.03 | \$38.29         |
| • Ward Clerk                                            | 5             | \$0.89 | \$4.45          |
| <i>Subtotal</i>                                         | 189.50        |        | \$350.20        |
| Post-surgery to initiation of chemotherapy              |               |        |                 |
| • Registered nurse                                      | 0             | \$1.36 | \$0.00          |
| • Clinical nurse specialist                             | 67.5          | \$1.76 | \$118.80        |
| • Registrar                                             | 7.50          | \$1.69 | \$12.68         |
| • House surgeon                                         | 7.50          | \$1.32 | \$9.90          |
| • Consultant                                            | 0             | \$4.03 | \$0.00          |
| • Ward Clerk                                            | 5.00          | \$0.89 | \$4.45          |
| <i>Subtotal</i>                                         | 87.50         |        | \$145.82        |
| <b>Total</b>                                            | <b>277.00</b> |        | <b>\$496.02</b> |
| <b>Incremental (i.e. Intervention minus comparator)</b> |               |        |                 |
| Diagnosis to surgery                                    |               |        |                 |
| • Registered nurse                                      | -101.88       | \$1.36 | -\$138.56       |
| • Clinical nurse specialist                             | 152.50        | \$1.76 | \$268.40        |
| • Registrar                                             | -18.13        | \$1.69 | -\$30.64        |
| • House surgeon                                         | -15.42        | \$1.32 | -\$20.35        |
| • Consultant                                            | -4.79         | \$4.03 | -\$19.30        |
| • Ward Clerk                                            | 5             | \$0.89 | \$4.45          |
| <i>Subtotal</i>                                         | 17.30         |        | \$64.03         |
| Post-surgery to initiation of chemotherapy              |               |        |                 |
| • Registered nurse                                      | -28.33        | \$1.36 | -\$38.53        |
| • Clinical nurse specialist                             | 52.50         | \$1.76 | \$92.40         |
| • Registrar                                             | -0.83         | \$1.69 | -\$1.40         |
| • House surgeon                                         | -16.88        | \$1.32 | -\$22.28        |
| • Consultant                                            | -6.25         | \$4.03 | -\$25.19        |
| • Ward Clerk                                            | 0             | \$0.89 | \$0.00          |
| <i>Subtotal</i>                                         | 0.21          |        | \$5.00          |
| <b>Total</b>                                            | <b>17.51</b>  |        | <b>\$69.03</b>  |



a Based on the following annual salaries:[2-4]

- House surgeon/officer (category D, year 2): \$74,557
- Registrar (category D, year 5) \$95,631
- Consultant (grade 10) \$173,349
- Registered nurse (step 5) \$61,362
- Clinical nurse specialist (grade 4, step 2) \$79,347
- Ward Clerk \$40,000

Overheads of 50% were then added to the above salaries.

93

#### 94 **Additional allied health referrals**

95 Additional allied health referrals associated with the CCC programme were based on data from the  
96 New South Wales programme: 83% of those with coordinated care were referred to an allied health  
97 professional such as a psychologist or social worker compared to 42 per cent with standard care) [5].

98 The national price for an outpatient purchase unit for a social worker in New Zealand is \$163.86 per  
99 contact. Our estimate (based on information from a local key informant) is that those who are  
100 referred would have six contacts.

101 Incremental probability of allied health =  $0.83 - 0.42 = 0.41$

102 Cost for those referred =  $6 * 163.86 = \$983.16$

103 Incremental cost averaged across all patients =  $0.41 * \$983.61 = \$403.10$

104 We also estimate that CCCs would refer an additional 50% of colon cancer patients to dieticians at  
105 \$115.89 per contact, with each two contacts per referral.

106 Probability of dietician = 0.5 (incremental)

107 Cost for those referred =  $2 * 115.89 = \$231.78$

108 Cost averaged across all patients =  $0.5 * \$231.78 = \$115.89$

109 Both of these additional costs would be incurred over time, however for simplicity we assumed that  
110 each patient in the intervention arm incurred these costs (we also conducted a scenario analysis  
111 without additional allied health costs – see main paper).

112 In the absence of information on variance, a standard deviation of 10% was assumed for allied  
113 health costs.

#### 114 **Uncertainty**

115 The data given in the resource use survey are interpreted as “on average patients required x time for  
116 this activity (the average point estimate), but some may require only y time (low end of range) and  
117 some may require as much as z time (upper end of range).” Thus, the variation is across individuals;  
118 as stated above, respondents found it too challenging to attempt to estimate variation in expected  
119 or mean values at the population-level.

120 Variation across the population will be less than that across individuals. To estimate population  
121 variation, we need to make an assumption regarding how much less that variation will be.

122 The standard formula for standard error of the mean (population variation) is:

$$SE = \frac{\text{upper CI} - \text{lower CI}}{2 * 1.96}$$

123 If we assume the population variation is quarter that of the individual variation, and that the range  
124 values approximate the 95% confidence intervals, the population standard error (SE) is calculated as  
125 follows:

$$SE = \frac{(\text{upper range} - \text{lower range}) * 0.25}{2 * 1.96}$$

126 The population variance is simply the SE squared.

127 In calculating costs, it was assumed that there is uncertainty around the number of resource units  
128 (e.g. minutes of care from the resource use survey), but no uncertainty around the price per unit

129 (salaries per minute). Thus scenario 3 for uncertainty of costs was applied, as per the BODE<sup>3</sup> Protocol  
130 on Direct Costing of Interventions[6].

131 The value of each item (i.e. the time assigned to each type of activity step according to the type of  
132 personnel performing the activity) was the average from the resource survey. Each respondent  
133 contributed data to a number of items, thus correlation would be expected – that is, an individual is  
134 likely to consistently underestimate or overestimate each item they provide an estimate for.  
135 Correlation both between items within each arm (intervention or comparator) and between arms  
136 was assumed to be 0.25. We used standard statistical formulas to estimate the variance about the  
137 sum of the individual items (with their variance as estimated above; normal distribution assumed),  
138 to give the total coordination cost and standard deviation estimate about the mean in both the  
139 intervention and comparator arms per patient:

- 140 • Provisional diagnosis to surgery cost:
  - 141 ○ CCC intervention arm: Estimated mean \$350.20, s.d. \$17.43
  - 142 ○ Comparator (or business-as-usual) arm: Estimated mean \$286.16, s.d. \$9.57
- 143 • Surgery to chemotherapy cost:
  - 144 ○ CCC intervention arm: Estimated mean \$145.82, s.d. \$7.53
  - 145 ○ Comparator (or business-as-usual) arm: Estimated mean \$140.82, s.d. \$4.79

146

147 Finally, we calculated the incremental cost and its variance and standard deviation (again assuming a  
148 correlation of 0.25 and standard statistical formula for the variance of differences):

- 149 • Provisional diagnosis to surgery incremental cost: \$64.03 (s.d. \$17.66)
- 150 • Surgery to start of chemotherapy incremental cost: \$5.00 (s.d. \$7.85).

151 Note that an assumption of correlations of 0 or 0.5 between items within each arm, and between  
152 the arms, had little impact on the estimated s.d. about the incremental cost. For example, the above

153 estimate of \$64.03 would have an s.d. of \$15.33 under the 0 correlation assumption, and \$17.56  
154 under the 0.5 assumption. This is because the correlations in summing items within each arm largely  
155 off-set the correlation between the arms when working out the variance. Accordingly, we do not  
156 present scenario analyses about varying correlations.

157 Also note the use of a normal distribution above the central limit theorem supports such a use,  
158 although for parameterised costs within just one arm we would err to still using a gamma  
159 distribution. However, here we model the incremental cost, which is the comparator cost subtracted  
160 from intervention cost. It is plausible that such costs might be negative (i.e. cost saving). A gamma  
161 distribution does not allow negative costs, and now that we are subtracting one arm's estimate from  
162 another, the normal distribution assumption has a stronger basis.

163 Regarding additional allied health professional costs (i.e. dietician and social worker), a similar  
164 procedure to above was used, except that an expected cost in the intervention arm only was  
165 estimated, and therefore a gamma distribution assumed.

## References

1. Blakely T, Foster R, Wilson N: **Burden of Disease Epidemiology, Equity and Cost-Effectiveness (BODE3) Study Protocol** In: *Burden of Disease Epidemiology, Equity and Cost-Effectiveness Programme*. Wellington: University of Otago Wellington 2012.
2. Resident Doctors' Association, District Health Boards: **Multi Employer Collective Agreement and Terms of Settlement 28 March 2011 to 31 March 2012**. In.; 2011.
3. New Zealand Nurses Organisation, District Health Boards: **Nursing and Midwifery Multi Employer Collective Agreement 1 April 2010 to 30 Sep 2011**. In.; 2011.
4. New Zealand District Health Boards, Association of Salaried Medical Specialists: **Senior Medical and Dental Officers Collective Agreement 1 July 2007 until 30 April 2010: Variation of Terms 9 September 2010**. In.; 2010.
5. Cancer Institute NSW: **Evaluation of the role of Cancer Care Coordinator**. Sydney: **Cancer Institute NSW**. In. New South Wales Cancer Institute NSW; 2011.
6. Foster R, Blakely T, Wilson N, al e: **Protocol for Direct Costing of Health Sector Interventions for Economic Modelling (Including Event Pathways)**. In. Wellington: Department of Public Health, University of Otago; 2012.
